RESEARCH ARTICLE

# Cellular and exosome mediated molecular defense mechanism in bovine granulosa cells exposed to oxidative stress

Mohammed Saeed-Zidane<sup>1</sup>, Lea Linden<sup>1</sup>, Dessie Salilew-Wondim<sup>1</sup>, Eva Held<sup>1</sup>, Christiane Neuhoff<sup>1</sup>, Ernst Tholen<sup>1</sup>, Michael Hoelker<sup>1,2,3</sup>, Karl Schellander<sup>1,2</sup>, Dawit Tesfaye<sup>1,2\*</sup>

**1** Institute of Animal Science, Department of Animal Breeding and Husbandry, University of Bonn, Bonn, Germany, **2** Teaching and Research Station Frankenforst, Faculty of Agriculture, University of Bonn, Königswinter, Germany, **3** Center of Integrated Dairy Research, University of Bonn, Bonn, Germany

\* [tesfaye@itw.uni-bonn.de](mailto:tesfaye@itw.uni-bonn.de)

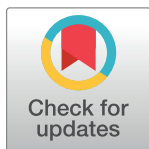

**OPEN ACCESS**

**Citation:** Saeed-Zidane M, Linden L, Salilew-Wondim D, Held E, Neuhoff C, Tholen E, et al. (2017) Cellular and exosome mediated molecular defense mechanism in bovine granulosa cells exposed to oxidative stress. PLoS ONE 12(11): e0187569. <https://doi.org/10.1371/journal.pone.0187569>

**Editor:** Aamir Ahmad, University of South Alabama Mitchell Cancer Institute, UNITED STATES

**Received:** June 27, 2017

**Accepted:** October 23, 2017

**Published:** November 8, 2017

**Copyright:** © 2017 Saeed-Zidane et al. This is an open access article distributed under the terms of the [Creative Commons Attribution License](https://creativecommons.org/licenses/by/4.0/), which permits unrestricted use, distribution, and reproduction in any medium, provided the original author and source are credited.

**Data Availability Statement:** All relevant data are within the paper and its Supporting Information files.

**Funding:** The authors received no specific funding for this work.

**Competing interests:** The authors have declared that no competing interests exist.

**Abbreviations:** DAPI, Complexes 4',6-diamidino-2-phenylindole; DMEM/F-12, Dulbecco's Modified

## Abstract

Various environmental insults including diseases, heat and oxidative stress could lead to abnormal growth, functions and apoptosis in granulosa cells during ovarian follicle growth and oocyte maturation. Despite the fact that cells exposed to oxidative stress are responding transcriptionally, the potential release of transcripts associated with oxidative stress response into extracellular space through exosomes is not yet determined. Therefore, here we aimed to investigate the effect of oxidative stress in bovine granulosa cells in vitro on the cellular and exosome mediated defense mechanisms. Bovine granulosa cells were aspirated from ovarian follicles and cultured in DMEM/F-12 Ham culture medium supplemented with 10% exosome-depleted fetal bovine serum. In the first experiment sub-confluent cells were treated with 5  $\mu\text{M}$   $\text{H}_2\text{O}_2$  for 40 min to induce oxidative stress. Thereafter, cells were subjected to ROS and mitochondrial staining, cell proliferation and cell cycle assays. Furthermore, gene and protein expression analysis were performed in  $\text{H}_2\text{O}_2$ -challenged versus control group 24 hr post-treatment using qRT-PCR and immune blotting or immunocytochemistry assay, respectively. Moreover, exosomes were isolated from spent media using ultracentrifugation procedure, and subsequently used for RNA isolation and qRT-PCR. In the second experiment, exosomes released by granulosa cells under oxidative stress (StressExo) or those released by granulosa cells without oxidative stress (NormalExo) were co-incubated with bovine granulosa cells in vitro to proof the potential horizontal transfer of defense molecules from exosomes to granulosa cells and investigate any phenotype changes. Exposure of bovine granulosa cells to  $\text{H}_2\text{O}_2$  induced the accumulation of ROS, reduced mitochondrial activity, increased expression of Nrf2 and its downstream antioxidant genes (both mRNA and protein), altered the cell cycle transitions and induced cellular apoptosis. Granulosa cells exposed to oxidative stress released exosomes enriched with mRNA of Nrf2 and candidate antioxidants. Subsequent co-incubation of StressExo with cultured granulosa cells could alter the relative abundance of cellular oxidative stress response molecules including Nrf2 and antioxidants CAT, PRDX1 and TXN1. The present study provide evidences that granulosa cells exposed to oxidative stress conditions react to stress by

Eagle Medium/Nutrient Mixture F-12; H<sub>2</sub>O<sub>2</sub>, Hydrogen peroxide; PBS-CMF, Ca<sup>2+</sup>/Mg<sup>2+</sup> free 1x phosphate buffer saline; ROS, Reactive oxygen species; NormalExo, Exosomes released from granulosa cells under normal conditions; StressExo, Exosomes released from granulosa cells under oxidative stress conditions; mRNA, Messenger RNA; qRT-PCR, Quantitative real time PCR ACTB: Actin beta; GAPDH, Glycereraldehyde-3-phosphate dehydrogenase; 18S, 18s ribosomal RNA; Nrf2, Nuclear factor, erythroid 2 like 2; Keap1, Kelch like ECH associated protein 1; CAT, Catalase; PRDX1, Peroxiredoxin 1; SOD1, Superoxide dismutase 1; HMOX1, Heme oxygenase 1; TXN1, Thioredoxin; NQO1, NAD(P)H quinone dehydrogenase 1; PCNA, Proliferating cell nuclear antigen; STAR1, Steroidogenic acute regulatory protein; Casp3, Caspase 3, apoptosis-related cysteine peptidase; BCL2L1, BCL2 like 1; CD63, CD63 molecule; Alix, ALG-2 interacting protein X; CYCS, Cytochrome c.

activating cascades of cellular antioxidant molecules which can also be released into extracellular environment through exosomes.

## Introduction

Stress induced by environment or physiology of the animals is considered as one of the important causes of impaired fertility in the dairy cattle [1,2]. A considerable number of evidences manifested that, various environmental and physiological insults including diseases, heat and oxidative stress could lead to abnormal growth and function of granulosa cells in ovarian follicular development [3,4]. Subsequently, granulosa cells apoptosis is responsible for follicular atresia [5] and subsequently oocyte and ovarian dysfunction [6,7]. Oxidative stress is defined as imbalance between the level of intracellular ROS production including superoxide anion (O<sub>2</sub><sup>-</sup>), hydrogen peroxide (H<sub>2</sub>O<sub>2</sub>), and hydroxyl radicals (·OH) and their scavenger by antioxidants [8–10]. Although ·OH is the most harmful free radical, H<sub>2</sub>O<sub>2</sub> has long half-life than the other free radicals which allowed a longer reaction with all of the cellular component including DNA. Therefore, despite lower reactivity of H<sub>2</sub>O<sub>2</sub>, its relatively longer half-life provides enough time for the molecule to move into the nucleus of the cell [11]. Despite the fact that cells exposed to oxidative stress respond transcriptionally [12–14], the role of extracellular vesicles including exosomes in mediating cell's response to oxidative stress should be carefully ruled [15].

Direct or indirect interactions of mammalian gametes with the surrounding somatic cells including granulosa and theca cells is vital for successful folliculogenesis [16–19]. The bidirectional communication between oocyte and surrounding cells during follicular development [20] can be mediated by extracellular vesicles [21,22]. Extracellular vesicles including exosomes (30–150 nm), microvesicles (150–1500) and apoptotic bodies (500–2000 nm) are derived from plasma membrane, outward budding of plasma membrane and outward blebbing of apoptotic cell membrane, respectively [23]. Exosomes are nano-sized vesicles and a member of extracellular membrane vesicles which mediate cell-to-cell communication under various conditions [22,24,25]. Furthermore, they are able to carry different cytosolic macromolecules (mRNA, miRNA and proteins) which can be transferred to recipient cells and induced alterations in their physiological functions [21].

Exosomes are part of extracellular vesicles with a size of 30–150 nm [26,27] that released through exocytosis process to the extracellular space and found in various biological fluids [28–32]. Regardless of origin, exosomes have similar and specific surface proteins such as CD9, CD63, CD81 and Alix [33]. In fact, exosomes contain a cargo of nucleic acids (DNA, mRNA, ncRNA), proteins, lipids and other molecules [34] and play vital role in cell-to-cell communication resulting in physiological changes in recipient cells [35,36]. Various cell types have been shown to release exosomes with various diversity in quality and quantity into the extracellular space as a response to various environmental insults and different pathological conditions [15,37]. Especially exosomes released under oxidative stress conditions could mediate a signal to recipient cells that alter their defense mechanism to prevent cell death under oxidative stress conditions [15]. Therefore, extracellular vesicles have been regarded as signalosomes: multifunctional signaling complexes for regulating fundamental cellular and biological functions [23].

Therefore, we hypothesized that granulosa cells under oxidative stress respond via activation of the cellular Nrf2 and downstream antioxidant molecules and those molecules will be



released into extracellular space through exosomes. To proof this hypothesis granulosa cells culture system was used as a model to investigate the response of cells to oxidative stress induced by H<sub>2</sub>O<sub>2</sub>. Results demonstrated the significant effect on granulosa cells ROS level, mitochondrial activity, proliferation, differentiation and cell cycle. Moreover, exosomes released from granulosa cells under oxidative stress conditions into extracellular space were investigated for the presence of antioxidant molecules as molecular responses to cellular stress.

## Material and methods

### Experimental design

To determine the right concentration of H<sub>2</sub>O<sub>2</sub> that induces ROS accumulation without a deleterious effect on granulosa cells, different doses of H<sub>2</sub>O<sub>2</sub> (2.5, 5, 10, 20 and 50 μM) were used to treat in vitro cultured bovine granulosa cells. Depending on the various investigations including morphological evaluation, ROS staining, mitochondrial activity and cell viability assays as shown in supplemental figures, a concentration of 5 μM H<sub>2</sub>O<sub>2</sub> was selected as moderate oxidative stress inducer in cultured granulosa cells in the present study. The first experiment was conducted to assess the effect of oxidative stress on granulosa cell functions as well as their cellular and extracellular response with regard to antioxidant molecules. For that, bovine granulosa cells were aspirated from small follicles (3–8 mm) and cultured in DMEM/F-12 Ham culture medium supplemented with 10% exosome-depleted fetal bovine serum (System Biosciences, CA, USA). Sub-confluent cells were exposed to 5 μM H<sub>2</sub>O<sub>2</sub> for 40 min. Twenty four hours post-treatment intracellular ROS level, mitochondrial activity, cell proliferation and the cell cycle assays were performed. Moreover, the cellular mRNA and protein expression levels were quantified. The spent media of the same cultured granulosa cells were collected for exosome isolation and subsequent analysis of transcript abundance for Nrf2 and its antioxidant downstream genes. The second experiment was carried out to elucidate the potential horizontal transfer of oxidative stress related molecular signal carried by exosomes from donor to recipient cells. For that, sub-confluent granulosa cells were co-cultured (with or without H<sub>2</sub>O<sub>2</sub>) with exosomes derived from spent media of stressed granulosa cells (StressExo) or from spent media of granulosa cells without stress (NormalExo). All phenotypic and molecular changes in recipient cells were investigated to proof the effect of exosome mediated horizontal transfer of defence molecules in recipient cells.

### Bovine granulosa cell culture

Bovine ovaries were collected from a local abattoir and transported within 1–2 hr to the lab in a thermic flask containing physiological saline solution (0.9% NaCl) at 37°C. Upon arrival, ovaries were washed 2–3 times with 37°C 0.9% NaCl, followed by rinsing in 70% warm ethanol for 30 sec and washed 3 times with 0.9% NaCl. Granulosa cells were aspirated from small growing follicles (3–8 mm diameter) using 18-gauge sterile needle and transferred into a 15 ml sterilized falcon tube containing Ca<sup>2+</sup>/Mg<sup>2+</sup> free 1x phosphate buffer saline (PBS-CMF). The cumulus-oocyte-complexes (COC) were left to stabilize at the bottom of the tube under 37°C. The upper phase containing granulosa cells was carefully transferred into new tubes with 1x PBS-CMF and centrifuged at 750xg for 7 min. The granulosa cell pellets were re-suspended in 500 μl red blood cell (RBC) lysis buffer for 1 min, followed by adding 3 ml DMEM/F-12 Ham (Sigma, Germany) and centrifuged at 500xg for 5 min. Afterwards, the pellets were washed with DMEM/F-12 Ham culture media supplemented with 10% exosome-depleted fetal bovine serum (System Biosciences, USA), 100 IU/ml penicillin and 100 μg/ml of streptomycin (Sigma, Germany), and 100 μg/ml fungizone (Sigma, Germany). Cell viability and concentration were determined using trypan blue exclusion method. Finally, a total of 2.5 x 10<sup>5</sup> live cell

per well were seeded into CytoOne<sup>®</sup> 24-well plate (Starlab International GmbH, Germany) in 600  $\mu$ l DMEM/F-12 Ham culture media supplemented with 10% exosome free FBS and incubated at 37°C with 5% CO<sub>2</sub>.

### ROS detection

Intracellular ROS level was determined using 2', 7'-dichlorofluorescein diacetate (H2DCFDA) (Life Technologies, Germany) according to manufacturer's instructions with some modifications. Briefly, granulosa cells from each group were cultured in 96-well plate and then incubated with 50  $\mu$ l of 75  $\mu$ M H2DCFDA for 20 min in dark at 37°C. Afterwards, incubated cells were washed twice with (PBS-CMF) and images were captured under inverted fluorescence microscope (Leica DM IRB, Leica, Wetzlar, Germany) using a green-fluorescence filter and images were analyzed using imageJ 1.48v (National Institutes of Health, USA, <http://imagej.nih.gov>).

### Mitochondrial staining

Approximately  $3 \times 10^4$  live cell per well were cultured in 8-well slide chamber and subjected to mitochondrial activity assay. For this, cells were incubated with 200 nM of MitoTracker red dye (MitoTracker1 Red CMXRos, M7512; Invitrogen) for 30 min. After washing twice with PBS-CMF, cells were fixed with 4% paraformaldehyde overnight at 4°C. Fixed cells were mounted with Vectashield (H-1200) containing DAPI. Images were acquired under confocal microscope CLSM LSM-780 and analyzed with imageJ 1.48v (National Institutes of Health, USA, <http://imagej.nih.gov>).

### Cell proliferation assay

Cell Counting Kit-8 (CCK-8) (Dojindo Molecular Technology, Japan) was used in the present study to perform cell proliferation assay. Briefly,  $1 \times 10^4$  live cell per well were seeded in 96-well plate and manufacturer's instructions 10  $\mu$ l of CCK-8/well was added to sub-confluent cells from all experimental groups, and then incubated for 3 hr at 37°C in 5% CO<sub>2</sub>. The optical density (OD) of released formazan dye which an indirect indicator of the number of living cells was measured at a wave length of 450 nm using a microplate reader (BioTek Instruments Inc, Germany). The OD of wells that contain only culture media were used as blank for normalization purpose.

### Cell cycle assay

Flow cytometry was used to demonstrate cell cycle profile in granulosa cells from each group under study. For that, cultured cells were trypsinized and centrifuged at 750xg for 5 min followed by two times washing with PBS-CMF. Cells were counted and a minimum  $1 \times 10^6$  of live cells were fixed in 70% ice-cold ethanol overnight at 4°C. The fixed cells were then centrifuged at 1200xg for 5 min, and the pellets were re-suspended and washed twice with 500  $\mu$ l of PBS-CMF. Thereafter, cells were stained with 50  $\mu$ g/ml of propidium iodide (PI) and 50  $\mu$ g/ml of RNase and kept at 37°C for 30 min. Cell cycle analysis was performed using BD LSRFortessa™ Flow cytometer (BD Biosciences). Data were analyzed using ModFit LT software (<http://www.vsh.com/products/mflt/index.asp>).

### Exosome isolation

Spent culture media from control and H<sub>2</sub>O<sub>2</sub>-challenged groups were collected and subjected to exosomes isolation procedure. Briefly, collected spent media were centrifuged at 300xg for

10 min to discard cells and 3000 $\times$ g for 30 to remove dead cells and 10000 $\times$ g to discard cellular debris followed by 30 min centrifugation at 30000 $\times$ g to remove micro vesicles. After that, exosomes were isolated using ultracentrifugation at 120,000 $\times$ g for 70 min in a Beckman SWTi55 rotor. Exosomes were washed with PBS-CMF and centrifuged once more at 120,000 $\times$ g for 70 min. All centrifugation steps were performed at 4°C unless indicated. Finally, isolated exosomes were suspended in PBS-CMF and stored at -80°C for further applications.

### Nanoparticle tracking and electron microscopy analysis

Exosomes identity and purity were determined by immune blotting of exosomal and cellular marker proteins (CD63, Alix and CYCS). Concentration and size distribution of exosomes was performed using NanoSight NS300 following manufacturer protocols (Malvern Instruments, Malvern, UK). Briefly, 10  $\mu$ l of purified exosomes were diluted in 1 ml PBS-CMF and used for five recording videos, videos were analyzed to give mean, mode, standard deviation and concentration of particles using NTA software. Moreover, electron microscope (Zeiss EM 109, Carl Zeiss) was used for exosomes characterization, 30  $\mu$ l drops of purified exosomes on parafilm were used to be absorbed by Formvar/carbon-coated grids. Five minutes later the Formvar/carbon-coated grids were washed using drops of PBS before incubation with 30  $\mu$ l drops of 2% uranyl acetate. Grids were washed with drops of PBS then examined and captured under electron microscope.

### RNA extraction and cDNA synthesis

Total RNA was isolated from collected cells and isolated exosomes using the miRNeasy Mini kit (Qiagen, Hilden; Germany) according to manufacturer's protocol including DNase digestion for removal of possible genomic DNA contamination. RNA concentration was measured using NanoDrop 8000 spectrophotometer (NanoDrop technologies). The cDNA was synthesized from total RNA using first stand cDNA synthesis kit (Thermo Fisher scientific, Germany). RNA concentration was adjusted using RNase free water and a maximum volume of 10  $\mu$ l RNA from each replicate was co-incubated with 0.5  $\mu$ l of 100  $\mu$ M Oligo (dT)<sub>18</sub> and 0.5  $\mu$ l of Random Primer at 65°C for 5 min then chilled on ice for 2 min. Thereafter, 1  $\mu$ l RiboLock RNase Inhibitor, 4  $\mu$ l 5x Reaction Buffer, 2  $\mu$ l dNTP and 2  $\mu$ l RevertAid Reverse Transcriptase, were added and incubated at 25°C for 5 min, 37°C for 60 min and 70°C for 5 min then subjected to gene expression analysis.

### Quantitative RT-PCR analysis of selected candidate genes

Relative transcript abundance of oxidative stress response genes (Nrf2, Keap1, SOD1, CAT, PRDX1, HMOX1, TXN1 and NQO1) was quantified using cDNA generated from cultured granulosa cells and isolated exosomes. Moreover, cell proliferation related genes (CCDN2 and PCNA), cell differentiation related genes (CYP11A1 and STAR1) and proapoptotic (Casp3) and antiapoptotic (BCL2L1) related genes were quantified only in granulosa cells using quantitative real time PCR in Applied Biosystem® StepOnePlus™ System (Thermo Fisher Scientific, Germany), using iTaq™ Universal SYBR® Green Supermix (Bio-Rad Laboratories GmbH, Germany). The real time PCR was run using the following program: 95°C for 3 min, 40 cycles at 95°C for 15 sec, 60°C for 45 sec followed by melting curve analysis. Data were analyzed using comparative threshold cycle method ( $\Delta\Delta$ CT) using actin, beta (ACTB) and phosphate dehydrogenase (GAPDH) as internal controls for cellular mRNA and ACTB, GAPDH and 18S genes for exosomal mRNA. All Primers listed in [S1 Table](#) were designed using primer designing tool online software (<http://www.ncbi.nlm.nih.gov/tools/primer-blast/>).

## Western blotting

Protein expression of (ACTB, Nrf2, Keap1, CAT, StAR1, PCNA) proteins in granulosa cells and (CYCS, CD63 and Alix) proteins in isolated exosomes were performed using immunoblotting. Isolated cellular protein and exosomes from each group were boiled with 2x SDS loading buffer at 95°C for 5 min before loading on a 12% SDS-PAGE gel. After electrophoresis, proteins were transferred to nitrocellulose membranes (Protran®, Schleicher & Schuell Bioscience) using blotting apparatus adjusted to 84 mA for 55 min. Membranes were blocked at room temperature with Roti-block solution (Carl Roth GmbH) for 1 hr and then incubated over night at 4°C with primary antibody against each of the candidate cellular proteins (Santa Cruz Biotechnology Inc, Germany: mouse monoclonal  $\beta$ -Actin (1:500), rabbit polyclonal Nrf2 (1:200), Keap1 (1:300), StAR1 (1:350), PCNA (1:350) and 1:300 rabbit polyclonal CAT, Life span Biosciences, Inc. Germany) or exosomal marker proteins (Santa Cruz Biotechnology Inc, Germany: goat polyclonal CYCS (1:350), Alix (1:350) and 1:250 rabbit polyclonal CD63, System BioSciences, USA). Afterwards, the membranes were washed with Tween-Tris-buffer saline (TTBS) and then incubated with secondary antibody (Santa Cruz Biotechnology Inc, Germany: goat anti mouse (1:5000), goat anti rabbit (1:5000) and donkey anti goat (1:5000)) for 1 hr at room temperature. Thereafter, the membranes were incubated with equal amount of peroxide solution and luminol enhancer at room temperature for 5 min in dark. Images were developed on ChemiDoc™ XRS+ system (Bio-Rad Laboratories GmbH, Germany).

## Immunocytochemistry

The cellular detection and localization of Nrf2 (Santa Cruz Biotechnology Inc, Germany, 1:200 polyclonal rabbit Nrf2) and CAT (1:250 polyclonal CAT, Life span Biosciences, Inc. Germany) proteins were determined using immunocytochemistry assay. For this, granulosa cells from each group were cultured in 4-well slide chamber and subjected to immunocytochemistry assay. Cells were fixed in 4% paraformaldehyde overnight at 4°C. Fixed cells were then washed 3 times with PBS-CMF and subsequently incubated with 0.3% triton for 10 min followed by blocking with 3% donkey serum for 1 hr at room temperature followed by incubation with primary antibody overnight at 4°C. Following that, cells were washed 3 times with PBS-CMF and incubated with fluorescent secondary antibody (Santa Cruz Biotechnology Inc, Germany, Alexa flour goat anti rabbit 1:350) for 3 hr at 37°C. After washing twice with PBS-CMF, the cells were mounted in mounting medium containing DAPI. Images were taken under laser scanning confocal microscope (LSM780-Carl Zeiss, Carl Zeiss GmbH; Germany) and analyzed with imageJ 1.48v (National Institutes of Health, USA, <http://imagej.nih.gov>).

## Exosome labeling and co-incubation with cultured granulosa cells

The uptake of exosomes by cultured granulosa cells was assessed after co-incubation using confocal microscope (LSM780-Carl Zeiss, Carl Zeiss GmbH; Germany). For this, purified exosomes were labeled using PKH67 dye (Sigma, Germany) according to the manufacturer's instructions as described previously [22]. Briefly, exosomes were suspended in 1 ml of diluent C containing 5  $\mu$ M PKH67 and incubated for 5 min. The labeling action was stopped by incubating for 1 min with an equal volume of exosome free FBS (system Biosciences, CA; USA) and then DMEM/F-12 media (Sigma, Germany) supplemented with 10% exosome free FBS was added and centrifuged at 120,000xg. Exosomes were washed two times with DMEM/F-12 and centrifuged at 120,000xg. Thereafter, exosomes were re-suspended in DMEM/F-12 media supplemented with 10% exosome free FBS. Granulosa cells were cultured in 8-well slide chamber in DMEM/F-12 media supplemented with 10% exosome free FBS and labeled exosomes were co-incubated with granulosa cells treated with or without H<sub>2</sub>O<sub>2</sub>. Cells were fixed in 4%

paraformaldehyde overnight at 4°C. After washing 2 times with PBS-CMF, cells were mounted in mounting medium containing DAPI and the up-take of exosomes was confirmed under a laser scanning confocal microscope (LSM780-Carl Zeiss Carl Zeiss GmbH; Germany). Twenty four hours post-treatment cells were investigated for ROS level, mitochondrial activity, cell proliferation, cell cycle, protein analysis using immunoblotting and immunocytochemistry assays. Moreover, mRNA expression of Nrf2 and antioxidant downstream genes was performed after co-nicubation granulosa cells with exosomes from stressed cells (StressExo) or exosomes from untreated normal cells (NormalExo).

## Statistical analysis

Data were analyzed using GraphPad Prism (Version 5) and presented as mean  $\pm$  SEM of four independent biological replicates. For response of granulosa cells to oxidative stress induced by H<sub>2</sub>O<sub>2</sub> in the first experiment, statistical differences in the mean values between treatment groups were compared using a two-tailed student's t-test. Statistical differences among means in the second experiment were analyzed using two-way analysis of variance (ANOVA) followed by multiple pair-wise comparisons using Tukey post-hoc test. Statistical significance was defined at  $p \leq 0.05$ .

## Results

### Dose dependent effect of H<sub>2</sub>O<sub>2</sub> on cultured bovine granulosa cells

In order to select a physiologically acceptable ROS inducer we have tested different doses of H<sub>2</sub>O<sub>2</sub> (2.5, 5, 10, 20 and 50  $\mu$ M) and subsequent morphological and physiological assessments were done to select the optimal dose of H<sub>2</sub>O<sub>2</sub> for further studies. As shown in supplemental file 1 morphological evaluation of granulosa cells after treatment revealed physical death of cells at concentrations beyond 5 micro molar of H<sub>2</sub>O<sub>2</sub>. Especially at doses beyond 50 micro molar of H<sub>2</sub>O<sub>2</sub> significant proportion of cells were found dead. In addition to that the ROS signal started to increase at 5  $\mu$ M H<sub>2</sub>O<sub>2</sub> compared to 2.5 and it does not change beyond the 5  $\mu$ M concentration (S2 Fig). Moreover, treatment of granulosa cells with all doses of H<sub>2</sub>O<sub>2</sub> except 2.5  $\mu$ M resulted in significant reduction in mitochondrial activity (S3 Fig). The 5  $\mu$ M dose is the minimum dose which resulted in significant reduction in mitochondrial activity compared to the other higher doses. Therefore, due to an induction of significant accumulation of ROS with moderate effect on morphology, mitochondrial activity and cell viability, a 5  $\mu$ M H<sub>2</sub>O<sub>2</sub> dose was selected to be used in the further experimental setups.

### Effect of oxidative stress on cell morphology, ROS accumulation and mitochondrial activity in bovine granulosa cells

The H<sub>2</sub>O<sub>2</sub> treatment resulted in morphological changes associated with semi rounded shape and shrunken membrane (Fig 1A and 1B). Moreover, cells challenged with 5  $\mu$ M H<sub>2</sub>O<sub>2</sub> exhibited significantly higher accumulation of intracellular ROS as compared to the untreated control at 24 hours post treatment (Fig 1C and 1D). On the other hand, the mitochondrial activity of H<sub>2</sub>O<sub>2</sub> challenged cells was lower than the untreated controls as illustrated in Fig 2.

### Oxidative stress reduced cell proliferation and G<sub>0</sub>/G<sub>1</sub> cell cycle transition

Cell proliferation assay results showed a reduction in cell viability of bovine granulosa cells challenged with 5  $\mu$ M H<sub>2</sub>O<sub>2</sub> compared to untreated controls (Fig 3A). These results were in agreement with cell cycle profile, which showed lower proportion of cells arrested at G<sub>0</sub>/G<sub>1</sub> phase (72.24%) in H<sub>2</sub>O<sub>2</sub> challenged cells as compared to the control ones (79.04%). Moreover,



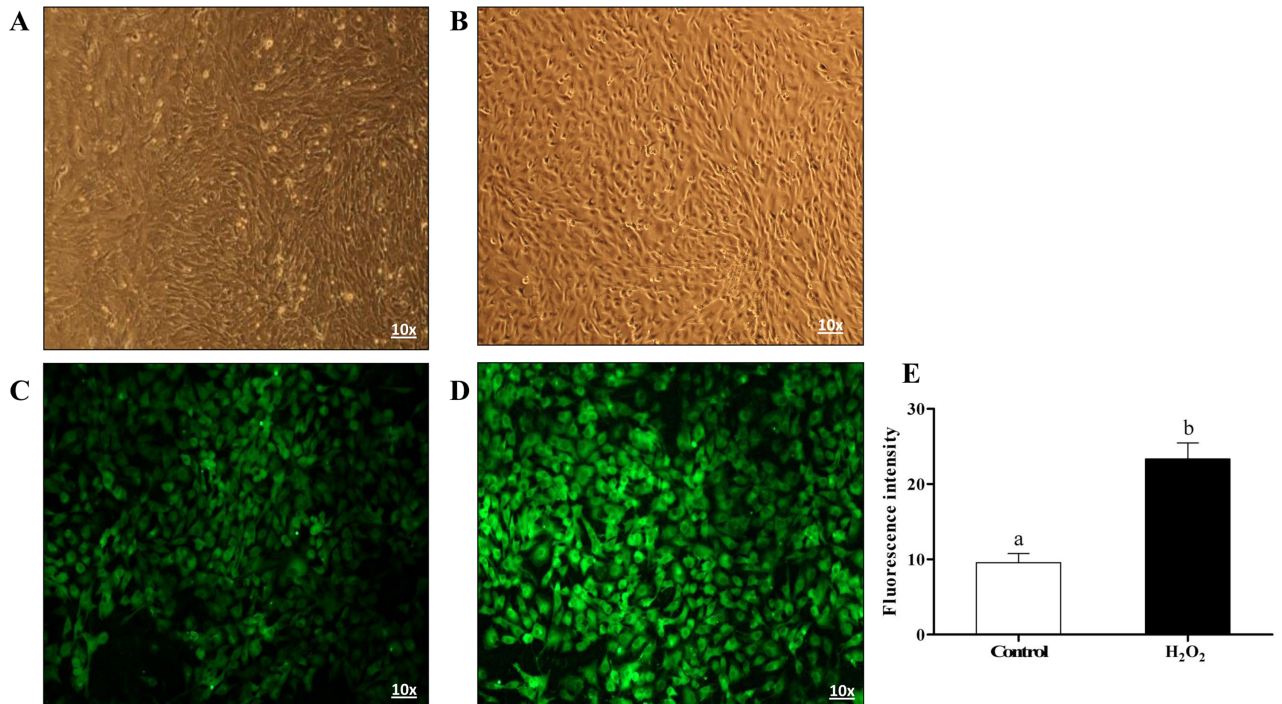

**Fig 1. H<sub>2</sub>O<sub>2</sub> altered cell morphology and ROS accumulation in bovine granulosa cells.** Cell morphological changes (A and B), intracellular ROS level (C and D) and ROS fluorescence intensity analysis (E) in H<sub>2</sub>O<sub>2</sub> untreated and treated groups, respectively. Data are mean ± SEM from four independent biological replicates. Bars with different letters showed statistically significant differences ( $p < 0.01$ ).

<https://doi.org/10.1371/journal.pone.0187569.g001>

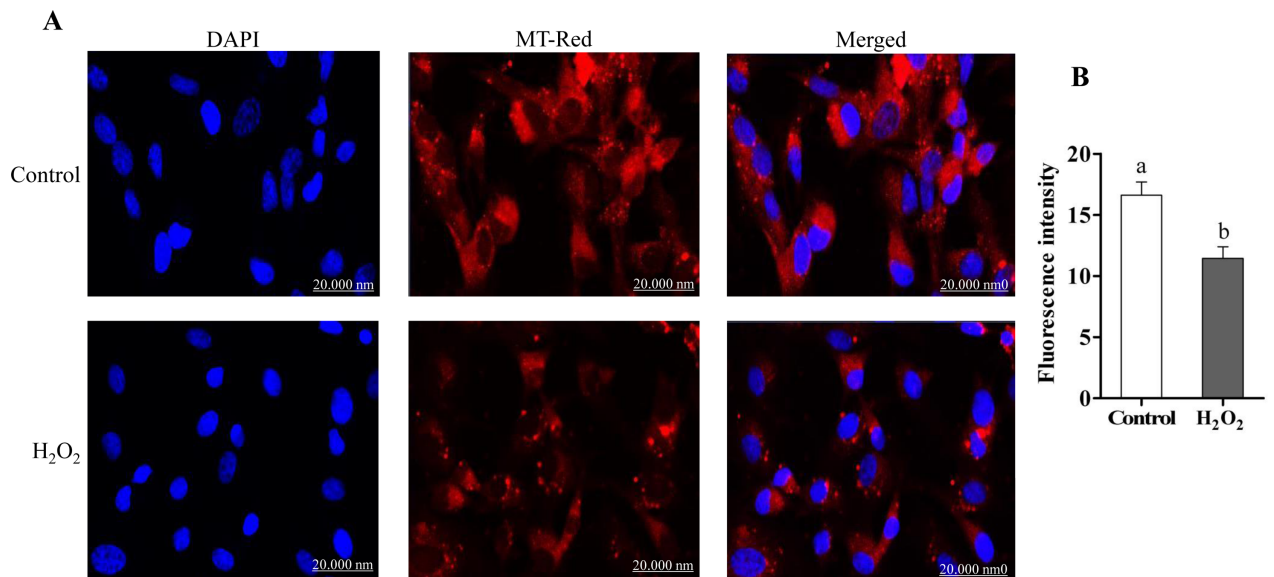

**Fig 2. Lower level of mitochondrial activity in H<sub>2</sub>O<sub>2</sub>-treated cells compared to control group.** The mitochondrial activity (A) and the fluorescence intensity analysis (B) in control and treated groups. The red colour indicated the MT-RED, while the blue colour indicated the nuclear staining using 4',6-diamidino-2-phenylindole (DAPI). Data are mean ± SEM from four independent biological replicates. Bars with different letters showed statistically significant differences ( $p < 0.05$ ).

<https://doi.org/10.1371/journal.pone.0187569.g002>

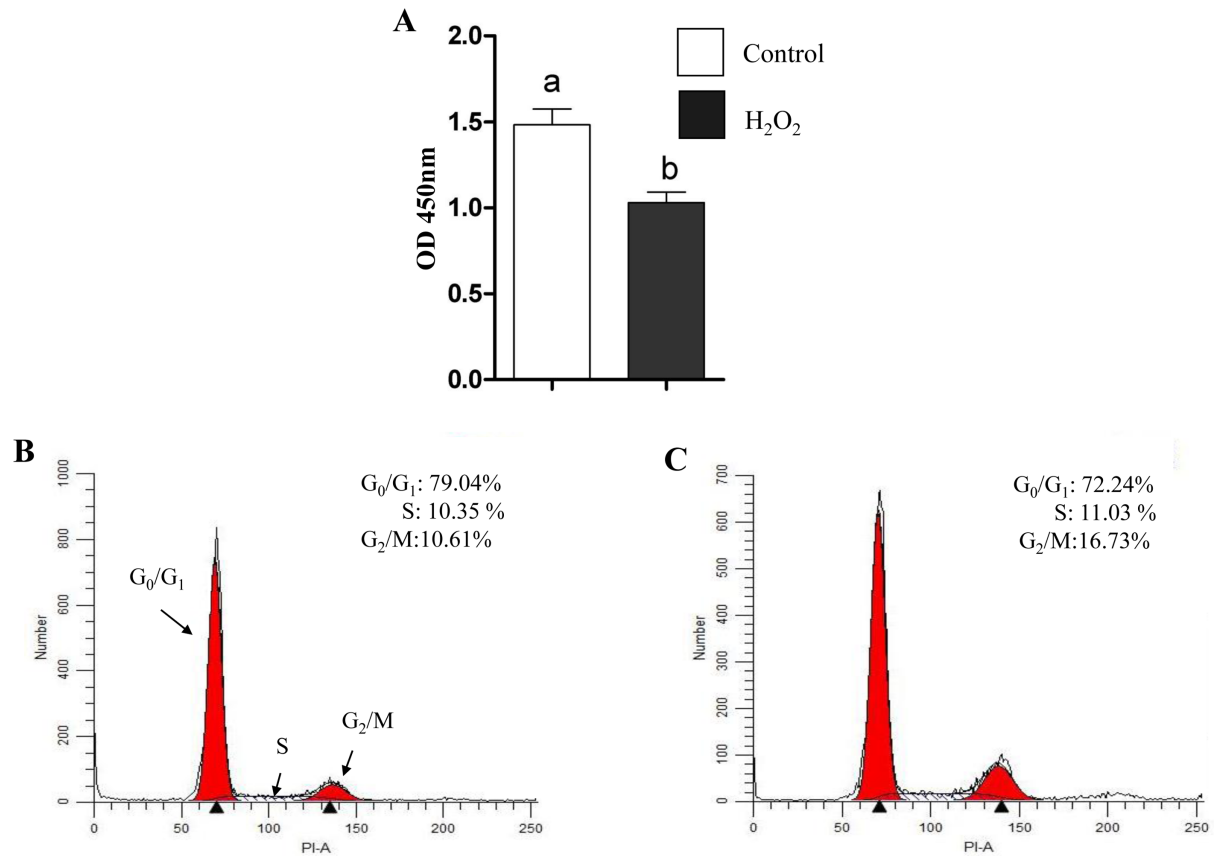

**Fig 3. Oxidative stress resulted in reduced granulosa cell proliferation and a shift in cell cycle transition.** (A) The proliferation rate in control (white bar) versus H<sub>2</sub>O<sub>2</sub> treated cells (black bar). Cell cycle analysis of granulosa cells under normal (B) or under oxidative stress conditions (C). The Y-axis indicated the cell count, while X-axis indicated the DNA content of cells detected by PI staining. Data are mean ± SEM from four independent biological replicates. Bars with different letters showed statistically significant differences ( $p < 0.05$ ).

<https://doi.org/10.1371/journal.pone.0187569.g003>

the percentage of cells that were found to be arrested at the G<sub>2</sub>/M phase was higher in cells challenged with 5 μM H<sub>2</sub>O<sub>2</sub> compared to untreated controls (16.73% vs. 10.61%) (Fig 3B and 3C).

### Oxidative stress increased the mRNA and protein expression levels of Nrf2 and its downstream antioxidants

Significantly higher mRNA and protein expression levels of Nrf2 was accompanied by lower mRNA and protein levels of its inhibitor Keap1 in granulosa cells challenged with H<sub>2</sub>O<sub>2</sub> compared to those cultured under normal conditions (Figs 4, 5A and 5B). Moreover, cells challenged with oxidative stress showed significantly increased expression level of Nrf2 downstream antioxidants namely: PRDX1 and TXN1. However, despite an elevated expression of mRNA for SOD1, CAT, HMOX1 and NQO1 antioxidants in challenged granulosa cells but those differences were not statistically significant (Fig 4). In contrary to that immunoblotting and immunocytochemistry assays revealed a significantly higher level of CAT protein in granulosa cells under oxidative stress conditions (Fig 5A and 5C).

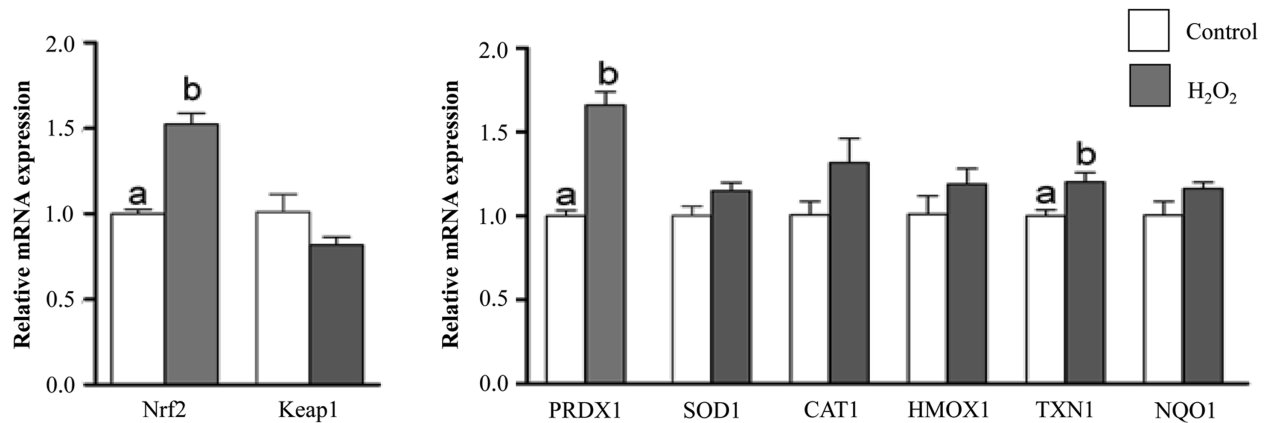

**Fig 4. Oxidative stress increased cellular mRNA expression level of Nrf2 and its downstream antioxidants.** qRT-PCR analysis of Nrf2 and downstream antioxidant genes in granulosa cells under normal (white bar) or oxidative stress (dark bar) conditions. Data are mean  $\pm$  SEM from four independent biological replicates. Bars with different letters showed statistically significant differences ( $p < 0.05$ ).

<https://doi.org/10.1371/journal.pone.0187569.g004>

### Expression of cell proliferation, differentiation, apoptosis marker genes under oxidative stress conditions

Cell proliferation and cell cycle assay results were in consistent with the mRNA and protein expression levels of candidate marker genes. Granulosa cells under oxidative stress conditions showed significant reduction in mRNA and protein levels of cell proliferation markers (PCNA and CCDN2) and anti-apoptotic (BCL2L1) marker genes. On the other hand, the mRNA and protein expression levels of genes related to differentiation (CYP11A1 and STAR1) and pro-apoptosis (Casp3) were higher in H<sub>2</sub>O<sub>2</sub>-challenged cells as compared to the control (Fig 6A, 6B and 6C).

### Exosomes released into culture media contain mRNA of Nrf2 and antioxidants

The identity of exosomes isolated from culture supernatant was confirmed by western blot analysis of marker proteins (CD63 and Alix). The absence of any detectable protein band for cytochrome c (CYCS) confirmed the purity of exosomes isolated using ultracentrifugation technique (Fig 7A). Nanoparticle tracking results revealed that, cells released higher concentration of exosomes with distinct size to culture media when exposed to oxidative stress as illustrated in Fig 6B. Moreover, the electron microscope results confirmed the size range of the isolated exosomes using the ultracentrifugation technique (Fig 7B and 7C).

Exosomes released into culture media from both H<sub>2</sub>O<sub>2</sub>-treated (StressExo) and untreated granulosa cells (NormalExo) were used for RNA isolation and investigation of the abundance of Nrf2 and its downstream antioxidant genes using qRT-PCR. Exosomes released from bovine granulosa cells under oxidative stress conditions were enriched with mRNA encoded by Nrf2 and had lower level Keap1. Moreover, exosomes released under oxidative stress conditions (StressExo) contained mRNA of CAT and TXN1 and significantly lower level of PRDX1 and HMOX1 genes mRNA compared to those exosomes released by untreated cells (NormalExo). On the other hand, exosomes from both groups did not show any significant difference in their mRNA content for SOD1 gene. Interestingly, NQO1 mRNA was not detected in exosomes of both treatment groups (Fig 8).

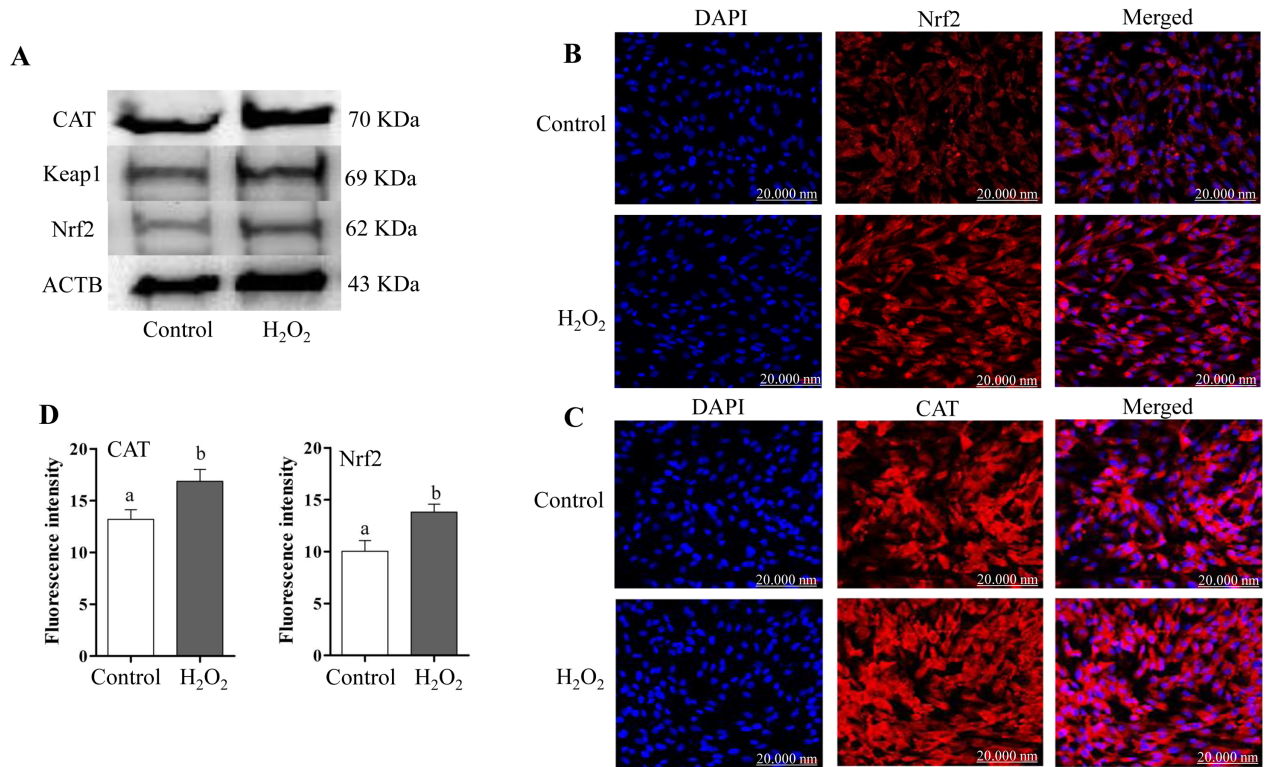

**Fig 5.** Immunoblotting analysis of Nrf2, Keap1 and CAT proteins (A) and immunocytochemistry of Nrf2 (B) and CAT (C) in bovine granulosa cells under oxidative stress and normal conditions while, (D) the fluorescence intensity analysis of Nrf2 and CAT proteins signal. The red colour indicated the expression of proteins, while the blue colour indicated the nuclear staining using 4',6-diamidino-2-phenylindole (DAPI). Data are mean  $\pm$  SEM from four independent biological replicates. Bars with different letters showed statistically significant differences ( $p < 0.05$ ).

<https://doi.org/10.1371/journal.pone.0187569.g005>

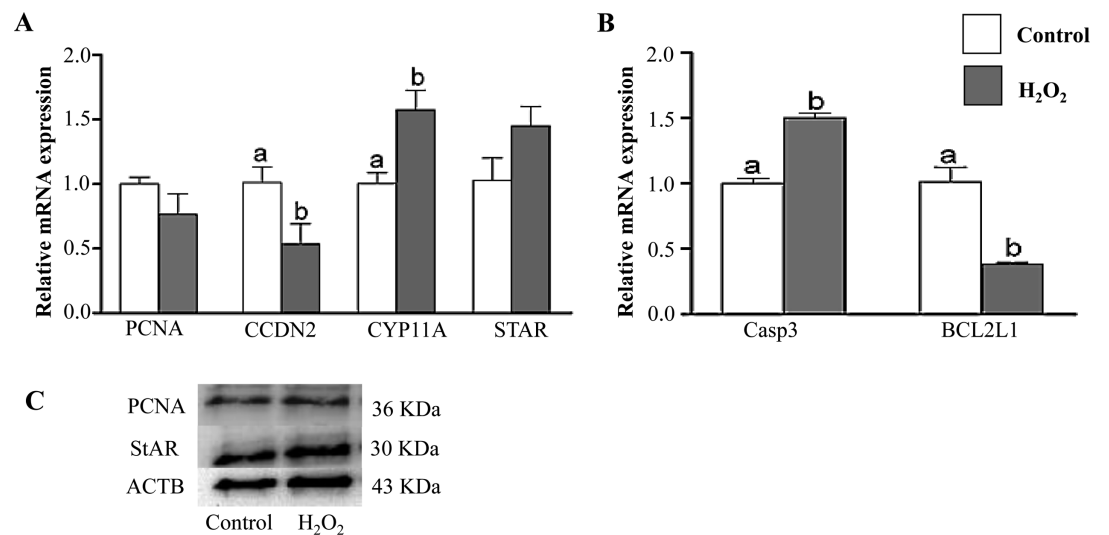

**Fig 6.** Quantitative RT-PCR analysis of cellular proliferation and differentiation marker genes (A) and pro- and anti-apoptotic marker genes (B) in granulosa cells under normal (white bar) or oxidative stress (dark bar) conditions. Western blot analysis of PCNA and StAR1 proteins (C). Data are mean  $\pm$  SEM from four independent biological replicates. Bars with different letters showed statistically significant differences ( $p < 0.05$ ).

<https://doi.org/10.1371/journal.pone.0187569.g006>



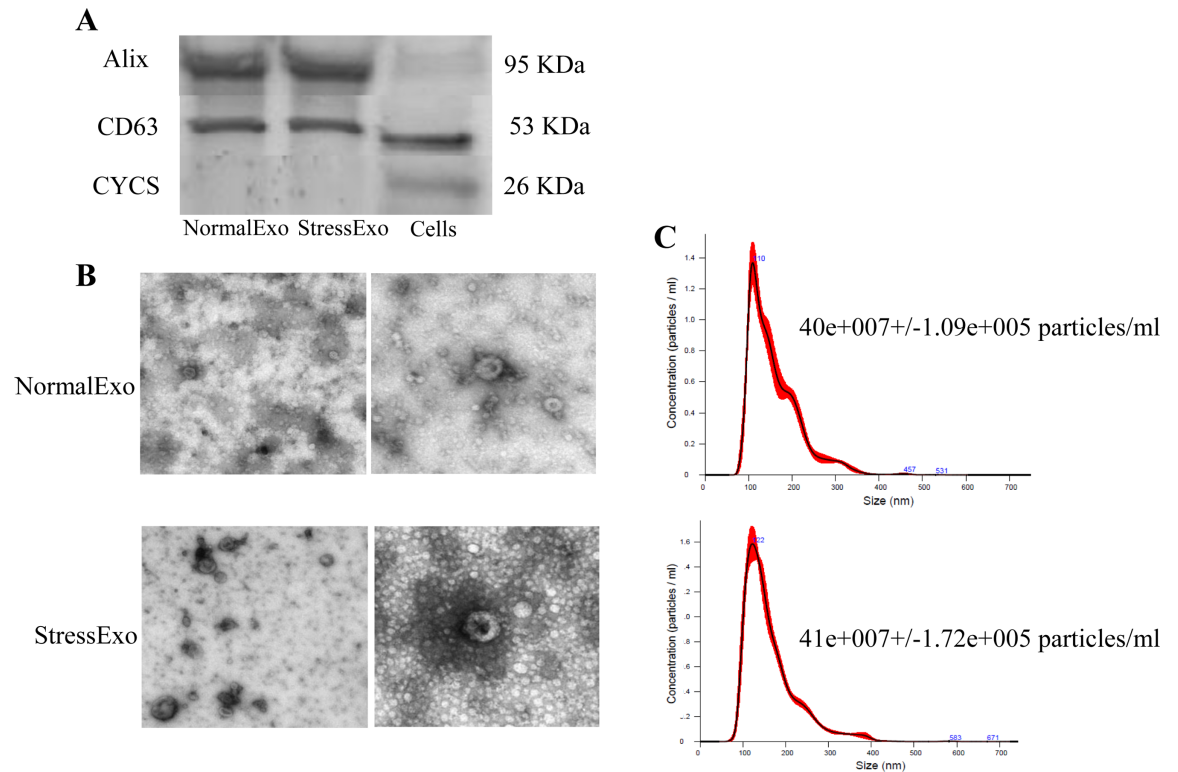

**Fig 7. Granulosa cells exposed to oxidative stress released high concentration of exosomes with distinct size to extracellular space compared to those cultured under normal conditions.** Western blot analysis of exosomes marker proteins (A). Electron microscope analysis (B) and nanoparticles tracking analysis (C) of exosomes released from granulosa cells under normal (NormalExo) and oxidative stress (StressExo) conditions (The Y-axis indicated the concentration (particles/ml) and X-axis indicated the size (nm)).

<https://doi.org/10.1371/journal.pone.0187569.g007>

## Horizontal transfer of oxidative stress defense mechanism in granulosa cells through exosomes

The uptake of labeled exosomes by granulosa cells during co-culture was confirmed under confocal microscope (Fig 9). The co-incubation of granulosa cells with StressExo resulted in lower intracellular ROS level and higher mitochondrial activity (Figs 10 and 11). Granulosa cells co-cultured under normal conditions with StressExo or NormalExo showed increased cell proliferation (Fig 12A). Similarly, cell cycle assay results demonstrated higher proportion of cells arrested at G<sub>0</sub>/G<sub>1</sub> phase and a lower proportion in G<sub>2</sub>/M phase in both cells co-cultured with StressExo or NormalEXo under oxidative stress conditions (Fig 12B).

## Co-culture of granulosa cells with StressExo increased the mRNA and protein levels of Nrf2 and antioxidants

To investigate whether co-incubation of granulosa cells with exosomes result in transfer of cargo molecules especially related to of oxidative response elements. Bovine granulosa cells were co-cultured with StressExo and NormalExo either under oxidative stress or normal conditions. Quantitative RT-PCR results showed that, the mRNA expression level of Nrf2 was significantly higher in granulosa cells co-cultured with StressEXo compared to those co-cultured with NormalExo in both under oxidative stress and normal conditions. Similarly, downstream



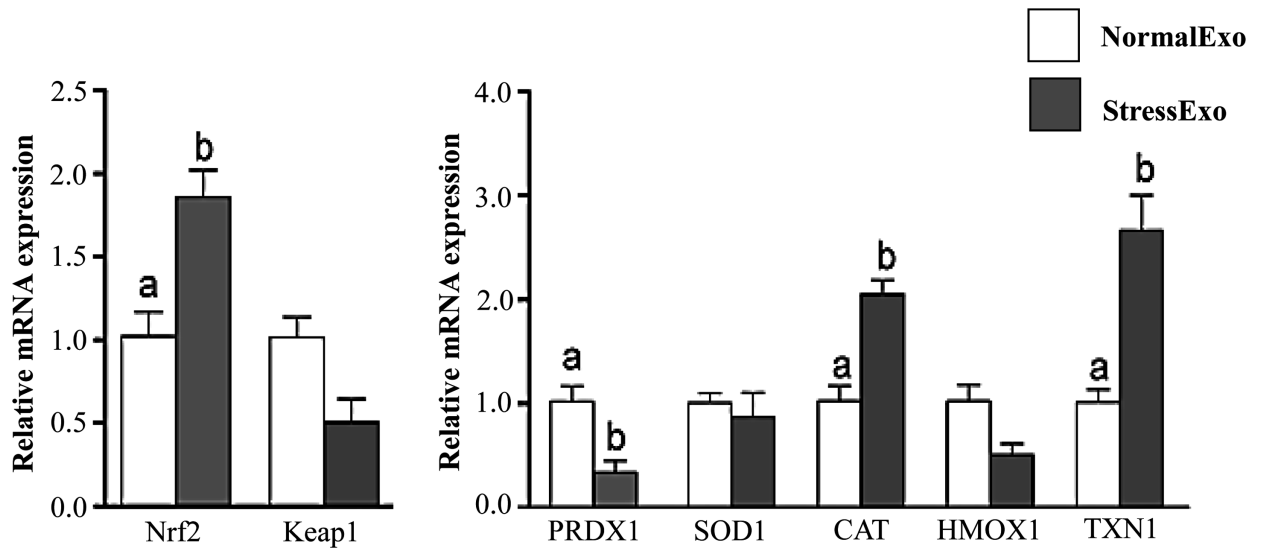

**Fig 8. Exosomes released from granulosa cells under oxidative stress conditions contained significantly higher mRNA level of Nrf2 and antioxidant genes compared to control group.** The relative mRNA expression level of Nrf2 and antioxidant genes in exosomes released from granulosa cells under normal (white bar) and oxidative stress (dark bar) conditions as analysed by qRT-PCR. Data are mean  $\pm$  SEM from four independent biological replicates. Bars with different letters showed statistically significant differences ( $p < 0.05$ ).

<https://doi.org/10.1371/journal.pone.0187569.g008>

genes of Nrf2 (CAT, PRDX1 and TXN1) showed higher abundance in granulosa cells co-cultured with StressExo compared to those cocultured with NormalExo (Fig 13). Similar expression was detected for Nrf2 protein level in granulosa cells co-cultured with StressExo. Higher expression of CAT protein was found in granulosa cells co-cultured with StressExo compared to those cultured with NormalExo under normal conditions (Fig 14).

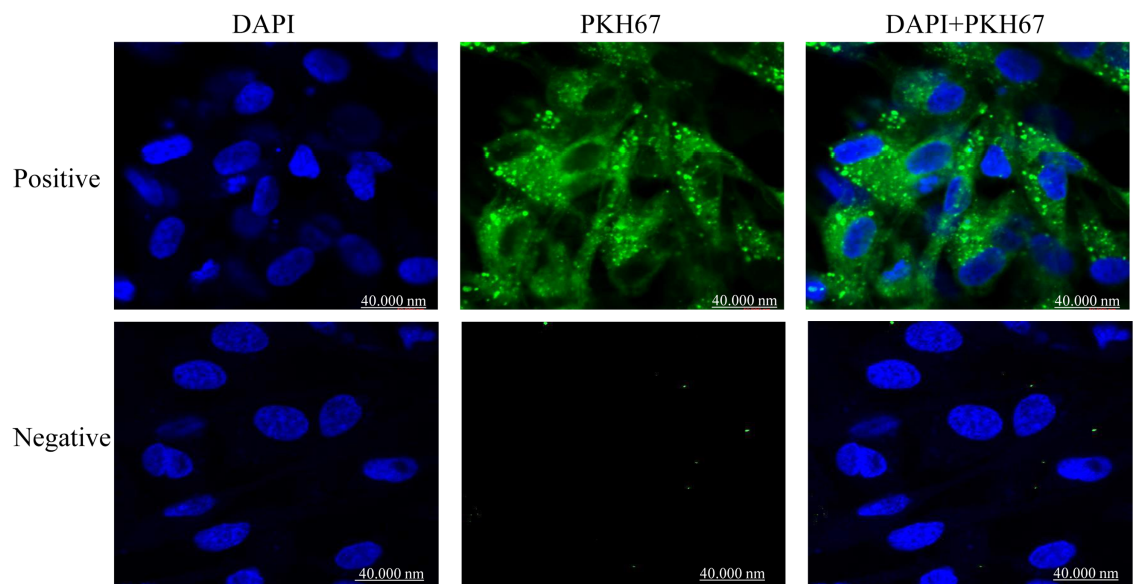

**Fig 9. Up take of PKH67 labeled exosomes by granulosa cells after co-incubation in vitro.** While green colour indicated labeled exosomes, blue colour represented nuclear staining using 4',6-diamidino-2-phenylindole (DAPI). Images were captured under confocal microscope.

<https://doi.org/10.1371/journal.pone.0187569.g009>

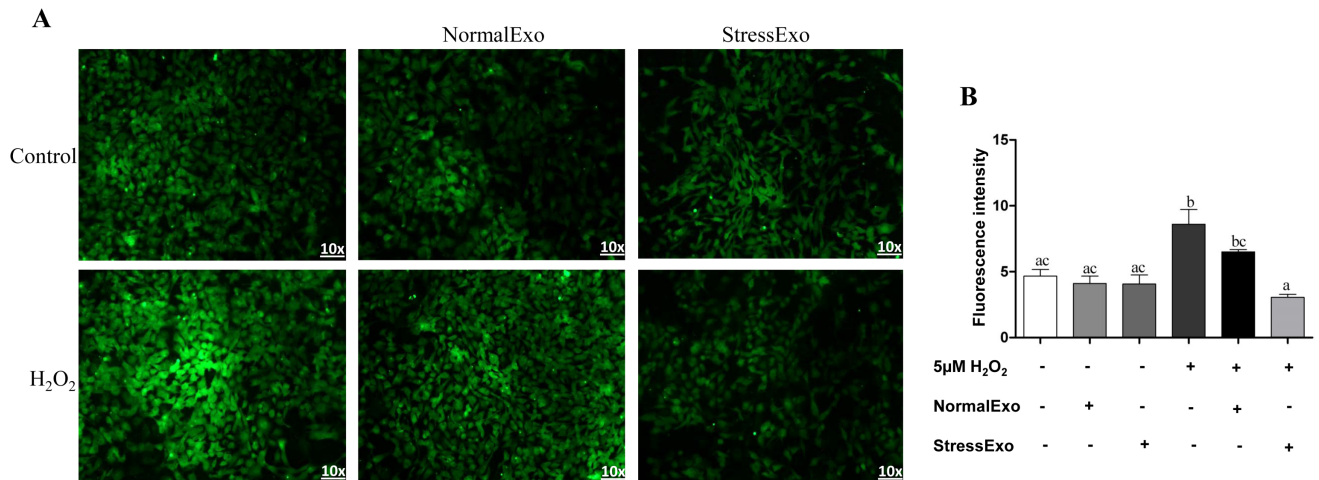

**Fig 10. Granulosa cells co-incubated with exosomes showed reduction in ROS level under oxidative stress or normal conditions compared to control ones.** The ROS level (A) was measured under normal or oxidative stress conditions in granulosa cells co-incubated with exosomes released under normal (NormalExo) or stress (StressExo) conditions compared to groups cultured without exosomes. The ROS fluorescence intensity analysis (B). Data are mean ± SEM from four independent biological replicates. Bars with different letters showed statistically significant differences ( $p < 0.05$ ).

<https://doi.org/10.1371/journal.pone.0187569.g010>

## Discussion

In dairy cattle, oxidative stress can be a result of several environmental and physiological factors such as heat stress, diet, high milk production, negative energy balance, diseases [38–42], that can lead to numerous deleterious effects on female reproduction and fertility [43,44]. Despite the fact that oxidative stress is an imbalance between reactive oxygen species (ROS) and antioxidants [9,10], large set of evidences are available for the critical physiological role

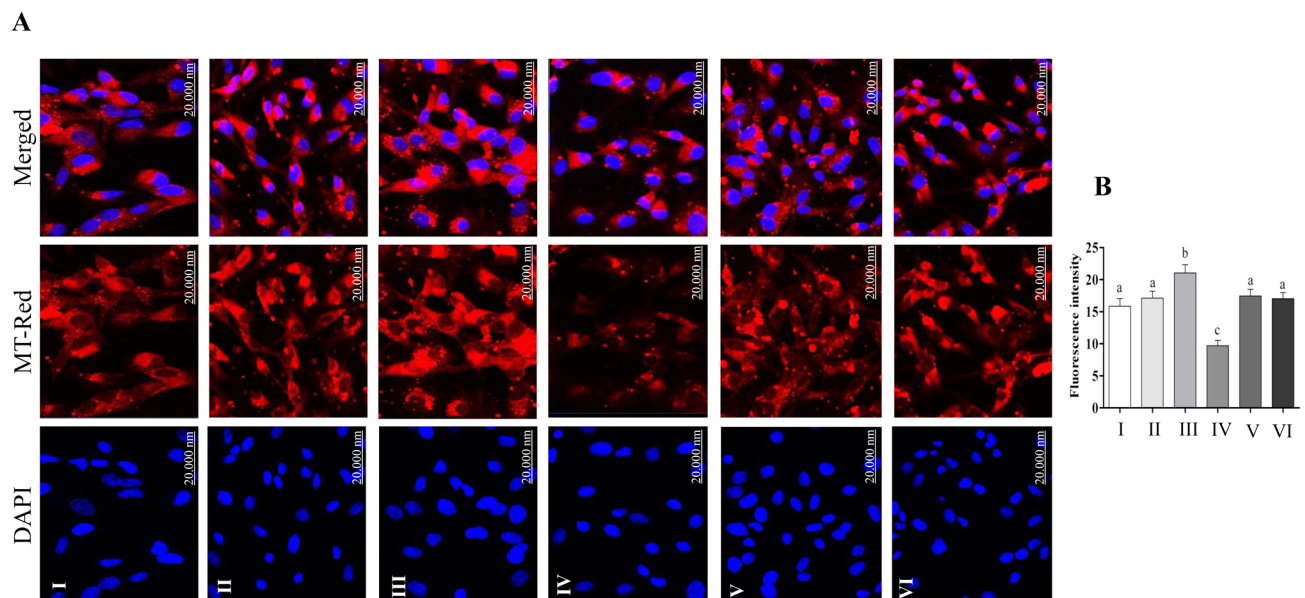

**Fig 11. The mitochondrial activity (A) and fluorescence intensity analysis (B) in granulosa cells co-incubated with NormalExo (II), StressExo (III) compared to those not coincubated with any exosomes (I) under normal conditions and the same treatment groups under oxidative stress conditions (IV–VI).** The red colour indicated the MT-RED, while the blue colour indicates the nuclear staining using 4', 6-diamidino-2-phenylindole (DAPI). Data fluorescent intensity signals (B) are mean ± SEM from four independent biological replicates. Bars with different letters showed statistically significant differences ( $p < 0.05$ ).

<https://doi.org/10.1371/journal.pone.0187569.g011>

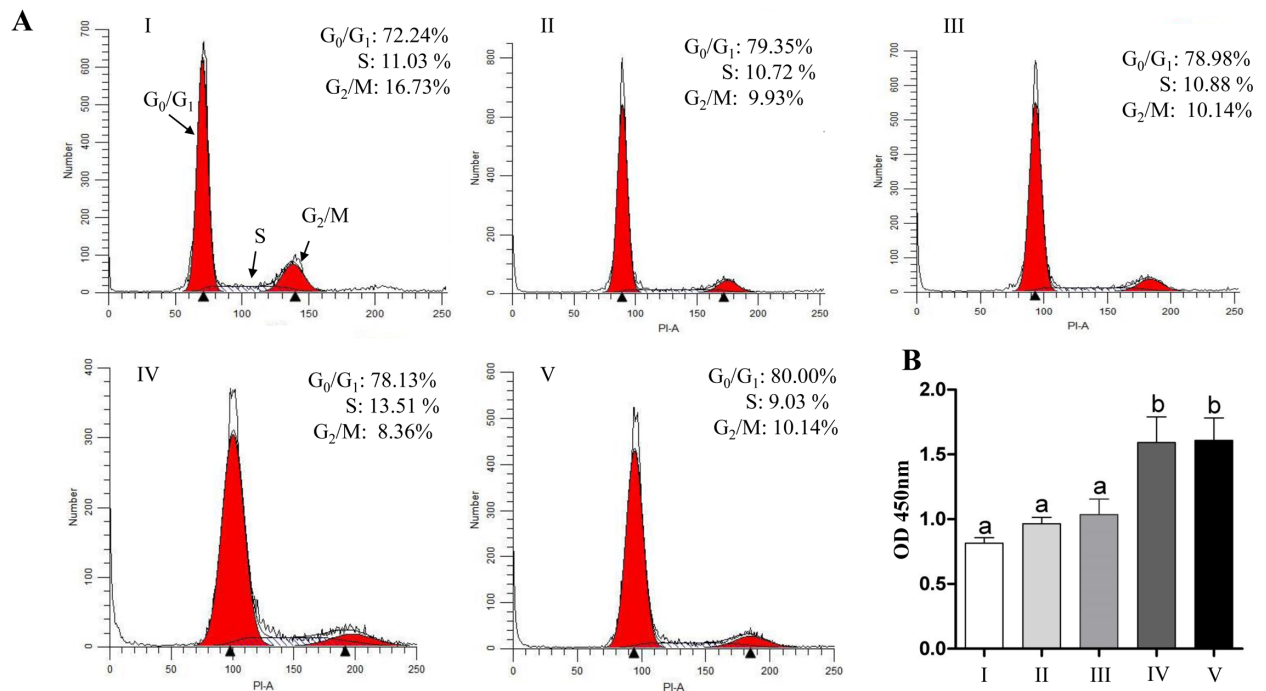

**Fig 12.** Co-incubation of bovine granulosa cells with StressExo altered the cell cycle (A) and cell proliferation (B) profiles under normal or oxidative stress conditions. Granulosa cells co-incubated without exosomes (I), NormalExo (II), StressExo (III) under normal conditions or without exosomes (IV), NormalExo (V), StressExo (VI) under oxidative stress conditions. The Y-axis indicates the cell count and X-axis indicates the DNA content of cells detected by PI staining. Data are mean  $\pm$  SEM from four independent biological replicates. Bars with different letters are statistically significant ( $p < 0.05$ ).

<https://doi.org/10.1371/journal.pone.0187569.g012>

of ROS particularly during folliculogenesis and ovulation being locally produced within the follicle by endothelial cells, neutrophils and macrophages [45]. However, excess ROS level including  $H_2O_2$  leads to granulosa cells apoptosis and subsequently oocyte dysfunction [46]. Granulosa cells are layers of somatic cells that are surrounding oocyte and play vital role for successful folliculogenesis and subsequently embryo development and pregnancy outcome [47,48]. Granulosa cells and their antioxidant system during maturation are responsible for preventing oocyte from oxidative stress damage [49,50]. Excess ROS level in granulosa cells results apoptosis [51–53], which in turn resulted follicular atresia and ovarian dysfunction [54]. Several evidences are accumulated for the effect of exogenous oxidative stress induced by  $H_2O_2$  resulted in higher ROS accumulation which is harmful for DNA, lipid, protein as well as mitochondria activity and integrity and subsequently lead to granulosa cell apoptosis [3,8,46,52,55]. In agreement with this, in the present study exposure of bovine granulosa cells to moderate level of  $H_2O_2$  resulted in higher intracellular ROS level accompanied with lower mitochondrial activity compared to untreated control (Figs 1 and 2). Even though mitochondria are considered one of the main sources of ROS in mammalian cells [56,57], its integrity is essential for steroidogenesis in granulosa cells [52,58]. Therefore, the reduction in activity of mitochondria in stressed granulosa cells in the present study may result in disturbances in the energy metabolism of those granulosa cells and proper steroidogenesis is impaired.

Cell cycle is a process regulated by growth factors that control different cellular pathways such as proliferation [59]. It has been reported that  $H_2O_2$  induced  $G_2/M$  cell cycle arrest and prevented osteoblasts cell proliferation by the reducing the expression of cyclin B1 [60]. Similarly, our results revealed that the proportion of cells under  $G_0/G_1$  phase were reduced while;

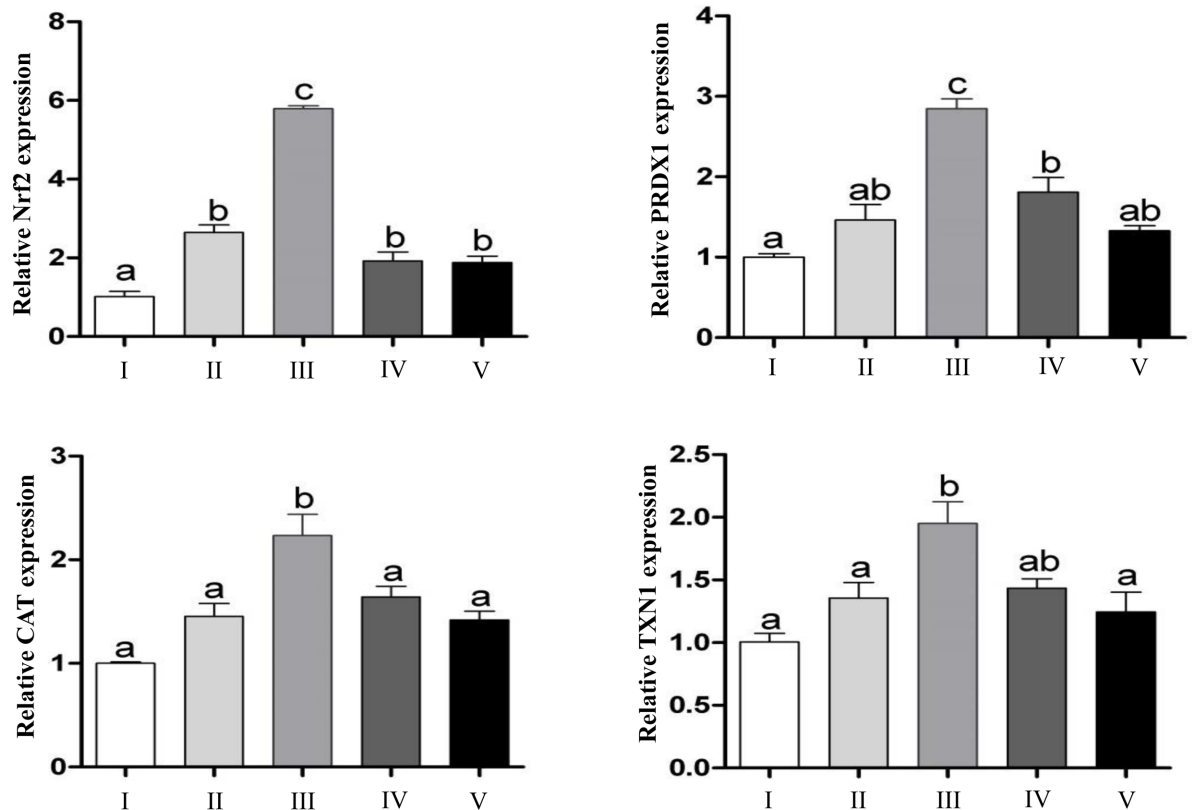

**Fig 13. Higher mRNA expression level of Nrf2 and antioxidant genes was detected under oxidative stress conditions in granulosa cells co-incubated with StressExo.** Expression level of Nrf2 and antioxidant genes in cells cultured under oxidative stress conditions (I), co-incubated with NormalExo (II) or StressExo (III) and cells cultured under normal conditions with NormalExo (IV) or StressExo (V). Data are mean  $\pm$  SEM from four independent biological replicates. Bars with different letters showed statistically significant differences ( $p < 0.05$ ).

<https://doi.org/10.1371/journal.pone.0187569.g013>

higher proportion of cells were arrested at G<sub>2</sub>/M phase in H<sub>2</sub>O<sub>2</sub>-challenged granulosa cells which is associated with a reduction in cell proliferation rate (Fig 3). This was further validated with the expression level of transcripts related to cell proliferation and cell cycle (PCNA and CCDN2). Moreover, significantly higher expression of pro-apoptotic marker gene (Casp3) with concomitant reduction of anti-apoptotic gene (BCL2L1) was observed in granulosa cells under oxidative stress conditions as it has been reported before [46].

The mammalian cells are outfitted with an assortment of antioxidants that serve to offset the impact of oxidative stress. The harmonic expression of these antioxidant genes eliminates the stress in order to reach the homeostasis state in a manner of prohibiting damage to cellular components that are sensitive to oxidative stress [61]. Nrf2-mediated oxidative stress response is one of the most important cytoprotective mechanisms for antioxidant induction and it is sequestered in cytosol by Keap1 protein. Under oxidative stress conditions, Nrf2 is released from Keap1, translocated to nucleus, binds to antioxidant response elements (ARE) and results in releasing of antioxidant molecules [62]. We have previously shown that the activation of Nrf2 and its downstream antioxidant genes are vital for the survival of bovine embryos under suboptimal culture conditions [63,64]. Similarly, in the present study we have evidenced the induction of the mRNA and protein of Nrf2 and its downstream antioxidants (PRDX1, SOD1, CAT, HMOX1, TXN1 and NQO1) in bovine granulosa cells in response to oxidative stress. Moreover, H<sub>2</sub>O<sub>2</sub>-challenged cells showed morphological changes accompanied with semi



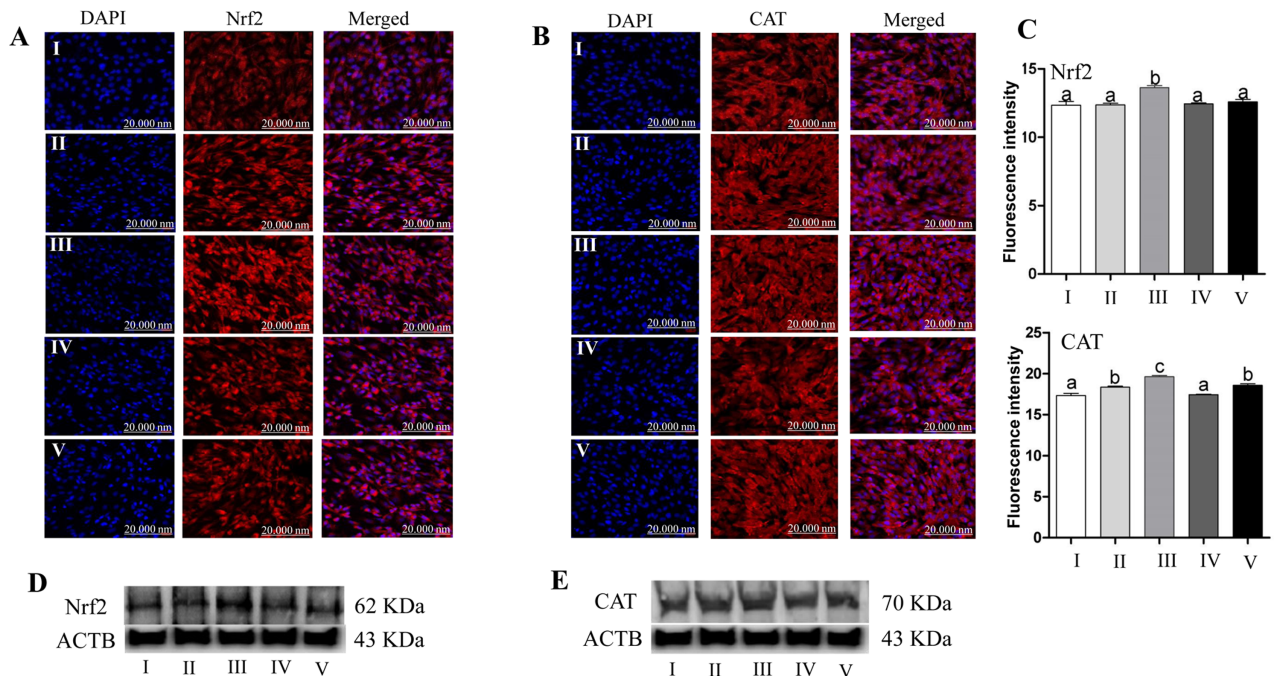

**Fig 14. The protein expression level of Nrf2 and CAT in granulosa cells co-incubated with exosomes was in the same line with their mRNA expression level.** The immunocytochemistry of Nrf2 (A) and CAT (B) in bovine granulosa cells co-incubated without exosome (I), NormalExo (II) or StressExo (III) under oxidative stress conditions or under normal conditions co-incubated with NormalExo (IV) or StressExo (V). The fluorescence intensity analysis (C) of Nrf2 and CAT immunocytochemistry signals. The western blot results of all groups for Nrf2 (D) and CAT (E) proteins. In the immunocytochemistry pictures the red colour indicated the expression of proteins, while the blue colour indicated the nuclear staining using 4',6-diamidino-2-phenylindole (DAPI). Data are mean  $\pm$  SEM from four independent biological replicates. Bars with different letters are statistically significant ( $p < 0.05$ ).

<https://doi.org/10.1371/journal.pone.0187569.g014>

rounded and shrunken plasma membrane (Fig 1B). Previous studies reported that  $H_2O_2$  affect cell membrane permeability by altering changes in membrane composition and stage of cell cycle [65]. The exposure of osteosarcoma cells to  $H_2O_2$  resulted in rounded shape and detachment of cells [66]. These findings may a result of dysregulation of focal adhesion and adhesion skeleton [67], which may result in increased distance and gaps between cells and result in impaired cell-to-cell communication.

The communication between various follicular somatic cells and the gamete during folliculogenesis can be either via gap junctions or through signal molecules mediated by the extracellular environment mainly follicular fluid. The presence and potential role of extracellular vesicles especially exosomes in follicular fluid has been reported in mare [25], women [68] and cow [22,69]. The quality and quantity of these extracellular vesicles vary depending on the physiological status of the cells, from where they are released [68,70,71] and are highly triggered by various stresses factors including diseases, heat stress as well as oxidative stress [72]. In agreement with that, our results demonstrated that culture media containing granulosa cells exposed to stress contained higher concentration of exosomes compared to those released by granulosa cells under normal conditions (Fig 7). Indeed, exosomes released under stress conditions are obviously differed in their RNA and protein contents compared to those released from physiologically normal cells and depending also on the type of stress the cells are exposed to [15,73]. Therefore, we were aiming at proofing the hypothesis that exosomes released from bovine granulosa cells under stress conditions may contain molecules associated with oxidative stress defense mechanism. Accordingly, exosomes released from bovine granulosa cells exposed to oxidative stress contained significant copy of mRNA molecules encoded by Nrf2 and selective antioxidant



molecules into extracellular space. As it has been shown in Fig 4 the enrichment of antioxidant transcripts in exosomes released by the granulosa cells in response to oxidative stress is not valid for all antioxidants. Exosomal mRNA level of Nrf2, CAT and TXN1 was significantly higher in StressExo compared to NormalExo unlike PRDX1 which showed significantly lower mRNA level in StressExo compared to NormalExo. On the other hand, there was no significant difference for mRNA level of SOD1 and HMOX1 which tended to be lower in StressExo compared to NormalExo. Interestingly, NQO1 was not detected at mRNA level in both groups (Fig 8). The mechanism of selection and packaging of selective antioxidants into extracellular space through exosomes is so far not clear and it is a subject for future research.

There are several mechanisms for the uptake of exosomes by recipient cells including endocytosis [74,75], simple fusion [76,77] and exosomal surface ligands [78,79]. The uptake of exosomes through either of these mechanisms resulting in functional alterations in recipient cells depending on the cargo molecule they are carrying with [22,80]. In the present study, we were aiming at validating the potential horizontal transfer of exosome mediated oxidative stress defense molecules among bovine granulosa cells. Following co-incubation of StressExo with cultured granulosa cells there was a significant increase in cellular mRNA levels of Nrf2 and its selective downstream antioxidants (CAT, PRDX1 and TXN1) (Fig 13). Similarly, a significant increase in protein expression of Nrf2 and CAT1 genes was observed in granulosa cells coincubated with StressExo. Catalase (CAT) is an enzyme that can deactivate one million free radicals per second per molecule in a single cycle of catalytic reaction [81]. We have evidenced in the first experiment that alteration in relative abundance of cellular defense molecules was also accompanied by a reduction in ROS accumulation and the corresponding increase in mitochondrial activity under oxidative stress conditions (Figs 1 and 2). Similarly, due to the horizontal transfer of oxidative stress defense molecules through exosomes, granulosa cells cocultured with StressExo showed a reduced ROS accumulation and the corresponding improved mitochondrial activity (Figs 10 and 11). Moreover, we have also evidenced that co-incubation of bovine granulosa cells with StressExo resulted in an increase in the proportion of cells under G<sub>0</sub>/G<sub>1</sub> phase and decrease in proportion of cells at G<sub>2</sub>/M phase, which is associated with increased proliferation rate under oxidative stress conditions (Fig 12). Taken together, these results suggest that oxidative stress-released exosomes carry antioxidant molecules defense molecules which can be uptaken by the neighboring cells to enrich their cellular defense mechanism in order to protect themselves against oxidative stress condition induced by the unfavourable environment.

## Conclusion

The present study provides evidence that the survival of granulosa cells under oxidative stress conditions is dependent on their ability to activate their Nrf2 mediated oxidative stress response mechanisms. Moreover, these several cellular cascades of antioxidant molecules can also be released into extracellular space being coupled with exosomes which have a great potential in transfer of defense molecules from one cells to the others.

## Ethics approval and consent to participate

The study was conducted on bovine granulosa cells derived from ovaries collected from local abattoir and thus special approval of this experiment was not essential.

## Supporting information

**S1 Fig. Dose dependent effect of H<sub>2</sub>O<sub>2</sub> on bovine granulosa cells morphology and cell death.**

(TIF)

**S2 Fig. ROS accumulation in bovine granulosa cells treated with different doses of H<sub>2</sub>O<sub>2</sub>.**

Data of ROS fluorescence intensity analysis are shown as mean ± SEM from four independent biological replicates in the graph presented. The quantification of ROS for cells treated with 50 μM H<sub>2</sub>O<sub>2</sub> was not possible as most cells were floating due to the toxic effect of the H<sub>2</sub>O<sub>2</sub>. Bars with different letters showed statistically significant differences ( $p < 0.05$ ).

(TIF)

**S3 Fig. The mitochondrial activity of bovine granulosa cells treated with different doses of H<sub>2</sub>O<sub>2</sub>.**

(TIF)

**S4 Fig. The effect of different doses of H<sub>2</sub>O<sub>2</sub> on bovine granulosa cells proliferation.** Data are mean ± SEM from four independent biological replicates. Bars with different letters are statistically significant ( $p < 0.05$ ).

(TIF)

**S1 Table. The list of genes used for expression analysis and the corresponding forward and reverse primer sequences with amplicon size.**

(DOC)

## Acknowledgments

We are grateful to Dr. Reinhard Bauer and Dr. Bernhard Fuss at Life and Medical Sciences Institute (LIMES) of the University of Bonn for their help in ultracentrifugation and Prof. Joachim Hamacher at Institut für Pflanzenkrankheiten, University of Bonn for his help with electron microscope. We are thankful for Prof. Elke Pogge von Strandmann and Maximiliane Schuldner at Innate Immunity Group at the Department of Internal Medicine I, University Hospital Cologne for their help during nanoparticles analysis. We also thankful to members of the Flow Cytometry Core Facility (FCCF) at the Institute of Molecular Medicine, University of Bonn.

## Author Contributions

**Conceptualization:** Christiane Neuhoff, Michael Hoelker, Karl Schellander, Dawit Tesfaye.

**Data curation:** Dessie Salilew-Wondim, Eva Held, Ernst Tholen, Dawit Tesfaye.

**Formal analysis:** Mohammed Saeed-Zidane, Christiane Neuhoff, Ernst Tholen.

**Funding acquisition:** Karl Schellander, Dawit Tesfaye.

**Investigation:** Mohammed Saeed-Zidane, Lea Linden, Dessie Salilew-Wondim, Michael Hoelker.

**Methodology:** Lea Linden, Eva Held, Michael Hoelker.

**Project administration:** Dawit Tesfaye.

**Resources:** Eva Held.

**Supervision:** Karl Schellander, Dawit Tesfaye.

**Validation:** Dessie Salilew-Wondim, Ernst Tholen.

**Visualization:** Michael Hoelker.

**Writing – original draft:** Mohammed Saeed-Zidane.

**Writing – review & editing:** Christiane Neuhoff, Michael Hoelker, Karl Schellander, Dawit Tesfaye.

## References

1. Abuelo A, Hernandez J, Benedito JL, Castillo C. The importance of the oxidative status of dairy cattle in the periparturient period. Revisiting antioxidant supplementation. *J Anim Physiol Anim Nutr (Berl)*. 2015; 99: 1003–1016. <https://doi.org/10.1111/jpn.12273> PMID: 25475653
2. Rensis F de, Scaramuzzi RJ. Heat stress and seasonal effects on reproduction in the dairy cow—a review. *Theriogenology*. 2003; 60: 1139–1151. PMID: 12935853
3. Zhang J-Q, Gao B-W, Wang J, Ren Q-L, Chen J-F, Ma Q, et al. Critical Role of FoxO1 in Granulosa Cell Apoptosis Caused by Oxidative Stress and Protective Effects of Grape Seed Procyanidin B2. *Oxid Med Cell Longev*. 2016; 2016: 6147345. <https://doi.org/10.1155/2016/6147345> PMID: 27057282
4. Li L, Wu J, Luo M, Sun Y, Wang G. The effect of heat stress on gene expression, synthesis of steroids, and apoptosis in bovine granulosa cells. *Cell Stress Chaperones*. 2016; 21: 467–475. <https://doi.org/10.1007/s12192-016-0673-9> PMID: 26847372
5. Hickey GJ, Chen SA, Besman MJ, Shively JE, Hall PF, Gaddy-Kurten D, et al. Hormonal regulation, tissue distribution, and content of aromatase cytochrome P450 messenger ribonucleic acid and enzyme in rat ovarian follicles and corpora lutea: relationship to estradiol biosynthesis. *Endocrinology*. 1988; 122: 1426–1436. <https://doi.org/10.1210/endo-122-4-1426> PMID: 3126038
6. Lee L, Asada H, Kizuka F, Tamura I, Maekawa R, Taketani T, et al. Changes in histone modification and DNA methylation of the StAR and Cyp19a1 promoter regions in granulosa cells undergoing luteinization during ovulation in rats. *Endocrinology*. 2013; 154: 458–470. <https://doi.org/10.1210/en.2012-1610> PMID: 23183184
7. Chaube Shail K., Shrivastav Tulsidas G., Prasad Shilpa, Tiwari Meenakshi, Tripathi Anima, Pandey Ashutosh N., Premkumar Karuppanan V. Clomiphene Citrate Induces ROS-Mediated Apoptosis in Mammalian Oocytes. *Cell Stress Chaperones*. 2016; 3: 467–475. <https://doi.org/10.4236/ojapo.2014.33006>
8. Schieber M, Chandel NS. ROS function in redox signaling and oxidative stress. *Curr Biol*. 2014; 24: R453–62. <https://doi.org/10.1016/j.cub.2014.03.034> PMID: 24845678
9. Betteridge DJ. What is oxidative stress. *Metabolism*. 2000; 49: 3–8.
10. Burton GJ, Jauniaux E. Oxidative stress. *Best Pract Res Clin Obstet Gynaecol*. 2011; 25: 287–299. <https://doi.org/10.1016/j.bpobgyn.2010.10.016> PMID: 21130690
11. Aprioku JS. Pharmacology of free radicals and the impact of reactive oxygen species on the testis. *J Reprod Infertil*. 2013; 14: 158–172. PMID: 24551570
12. Szybowska AA, Ruiter H de, Meijer LAT, Smits LMM, Burgering BMT. Oxidative stress-dependent regulation of Forkhead box O4 activity by nemo-like kinase. *Antioxid Redox Signal*. 2011; 14: 563–578. <https://doi.org/10.1089/ars.2010.3243> PMID: 20874444
13. Kops GJPL, Dansen TB, Polderman PE, Saarloos I, Wirtz KWA, Coffey PJ, et al. Forkhead transcription factor FOXO3a protects quiescent cells from oxidative stress. *Nature*. 2002; 419: 316–321. <https://doi.org/10.1038/nature01036> PMID: 12239572
14. Omata Y, Saito Y, Fujita K, Ogawa Y, Nishio K, Yoshida Y, et al. Induction of adaptive response and enhancement of PC12 cell tolerance by lipopolysaccharide primarily through the upregulation of glutathione S-transferase A3 via Nrf2 activation. *Free Radic Biol Med*. 2008; 45: 1437–1445. <https://doi.org/10.1016/j.freeradbiomed.2008.08.018> PMID: 18793714
15. Eldh M, Ekstrom K, Valadi H, Sjostrand M, Olsson B, Jernas M, et al. Exosomes communicate protective messages during oxidative stress; possible role of exosomal shuttle RNA. *PLoS One*. 2010; 5: e15353. <https://doi.org/10.1371/journal.pone.0015353> PMID: 21179422
16. Eppig JJ, Wigglesworth K, Pendola FL. The mammalian oocyte orchestrates the rate of ovarian follicular development. *Proc Natl Acad Sci U S A*. 2002; 99: 2890–2894. <https://doi.org/10.1073/pnas.052658699> PMID: 11867735
17. Matzuk MM, Burns KH, Viveiros MM, Eppig JJ. Intercellular communication in the mammalian ovary: oocytes carry the conversation. *Science*. 2002; 296: 2178–2180. <https://doi.org/10.1126/science.1071965> PMID: 12077402
18. Vanderhyden BC, Caron PJ, Buccione R, Eppig JJ. Developmental pattern of the secretion of cumulus expansion-enabling factor by mouse oocytes and the role of oocytes in promoting granulosa cell differentiation. *Dev Biol*. 1990; 140: 307–317. PMID: 2115479

19. Vanderhyden BC, Telfer EE, Eppig JJ. Mouse oocytes promote proliferation of granulosa cells from pre-antral and antral follicles in vitro. *Biol Reprod.* 1992; 46: 1196–1204. PMID: [1391318](#)
20. Kidder GM, Vanderhyden BC. Bidirectional communication between oocytes and follicle cells: ensuring oocyte developmental competence. *Can J Physiol Pharmacol.* 2010; 88: 399–413. <https://doi.org/10.1139/y10-009> PMID: [20555408](#)
21. Di Pietro C. Exosome-mediated communication in the ovarian follicle. *Journal of assisted reproduction and genetics.* 2016; 33: 303–311. <https://doi.org/10.1007/s10815-016-0657-9> PMID: [26814471](#)
22. Sohel MMH, Hoelker M, Noforesti SS, Salilew-Wondim D, Tholen E, Looft C, et al. Exosomal and Non-Exosomal Transport of Extra-Cellular microRNAs in Follicular Fluid: Implications for Bovine Oocyte Developmental Competence. *PLoS One.* 2013; 8: e78505. <https://doi.org/10.1371/journal.pone.0078505> PMID: [24223816](#)
23. El Andaloussi S, Lakhali S, Mager I, Wood MJA. Exosomes for targeted siRNA delivery across biological barriers. *Adv Drug Deliv Rev.* 2013; 65: 391–397. <https://doi.org/10.1016/j.addr.2012.08.008> PMID: [22921840](#)
24. Ciardiello C, Cavallini L, Spinelli C, Yang J, Reis-Sobreiro M, Candia P de, et al. Focus on Extracellular Vesicles: New Frontiers of Cell-to-Cell Communication in Cancer. *Int J Mol Sci.* 2016; 17: 175. <https://doi.org/10.3390/ijms17020175> PMID: [26861306](#)
25. da Silveira JC, Veeramachaneni DNR, Winger QA, Carnevale EM, Bouma GJ. Cell-secreted vesicles in equine ovarian follicular fluid contain miRNAs and proteins: a possible new form of cell communication within the ovarian follicle. *Biol Reprod.* 2012; 86: 71. <https://doi.org/10.1095/biolreprod.111.093252> PMID: [22116803](#)
26. Li M, Zeringer E, Barta T, Schageman J, Cheng A, Vlassov AV. Analysis of the RNA content of the exosomes derived from blood serum and urine and its potential as biomarkers. *Philos Trans R Soc Lond B Biol Sci.* 2014; 369. <https://doi.org/10.1098/rstb.2013.0502> PMID: [25135963](#)
27. Sharma A, Khatun Z, Shiras A. Tumor exosomes: cellular postmen of cancer diagnosis and personalized therapy. *Nanomedicine (Lond).* 2016; 11: 421–437. <https://doi.org/10.2217/nmm.15.210> PMID: [26784674](#)
28. Pan BT, Teng K, Wu C, Adam M, Johnstone RM. Electron microscopic evidence for externalization of the transferrin receptor in vesicular form in sheep reticulocytes. *J Cell Biol.* 1985; 101: 942–948. PMID: [2993317](#)
29. Thery C, Zitvogel L, Amigorena S. Exosomes: composition, biogenesis and function. *England;01.01.2002.*
30. Keller S, Sanderson MP, Stoek A, Altevogt P. Exosomes: from biogenesis and secretion to biological function. *Immunol Lett.* 2006; 107: 102–108. <https://doi.org/10.1016/j.imlet.2006.09.005> PMID: [17067686](#)
31. Frydrychowicz M, Kolecka-Bednarczyk A, Madejczyk M, Yasar S, Dworacki G. Exosomes—structure, biogenesis and biological role in non-small-cell lung cancer. *Scand J Immunol.* 2015; 81: 2–10. <https://doi.org/10.1111/sji.12247> PMID: [25359529](#)
32. Sluijter JPG, Verhage V, Deddens JC, van den Akker F, Doevendans PA. Microvesicles and exosomes for intracardiac communication. *Cardiovasc Res.* 2014; 102: 302–311. <https://doi.org/10.1093/cvr/cvu022> PMID: [24488559](#)
33. Vlassov AV, Magdaleno S, Setterquist R, Conrad R. Exosomes: current knowledge of their composition, biological functions, and diagnostic and therapeutic potentials. *Biochim Biophys Acta.* 2012; 1820: 940–948. <https://doi.org/10.1016/j.bbagen.2012.03.017> PMID: [22503788](#)
34. Silva M, Melo SA. Non-coding RNAs in Exosomes: New Players in Cancer Biology. *Curr Genomics.* 2015; 16: 295–303. <https://doi.org/10.2174/1389202916666150707154719> PMID: [27047249](#)
35. Valadi H, Ekstrom K, Bossios A, Sjostrand M, Lee JJ, Lotvall JO. Exosome-mediated transfer of mRNAs and microRNAs is a novel mechanism of genetic exchange between cells. *Nat Cell Biol.* 2007; 9: 654–659. <https://doi.org/10.1038/ncb1596> PMID: [17486113](#)
36. Peinado H, Aleckovic M, Lavotshkin S, Matei I, Costa-Silva B, Moreno-Bueno G, et al. Melanoma exosomes educate bone marrow progenitor cells toward a pro-metastatic phenotype through MET. *Nat Med.* 2012; 18: 883–891. <https://doi.org/10.1038/nm.2753> PMID: [22635005](#)
37. Yuan M-J, Maghsoudi T, Wang T. Exosomes Mediate the Intercellular Communication after Myocardial Infarction. *Int J Med Sci.* 2016; 13: 113–116. <https://doi.org/10.7150/ijms.14112> PMID: [26941569](#)
38. Bernabucci U, Ronchi B, Lacetera N, Nardone A. Oxidative stress in primiparous cows in relation to dietary starch and the progress of lactation. *J Dairy Sci.* 2002; 85: 2173–2179. [https://doi.org/10.3168/jds.S0022-0302\(02\)74296-3](https://doi.org/10.3168/jds.S0022-0302(02)74296-3) PMID: [12362449](#)
39. Guo Y, Xu X, Zou Y, Yang Z, Li S, Cao Z. Changes in feed intake, nutrient digestion, plasma metabolites, and oxidative stress parameters in dairy cows with subacute ruminal acidosis and its regulation

- with pelleted beet pulp. *J Anim Sci Biotechnol*. 2013; 4: 31. <https://doi.org/10.1186/2049-1891-4-31> PMID: 23947764
40. Castillo C, Hernandez J, Valverde I, Pereira V, Sotillo J, Alonso ML, et al. Plasma malonaldehyde (MDA) and total antioxidant status (TAS) during lactation in dairy cows. *Res Vet Sci*. 2006; 80: 133–139. <https://doi.org/10.1016/j.rvsc.2005.06.003> PMID: 16084546
  41. Bernabucci U, Ronchi B, Lacetera N, Nardone A. Influence of body condition score on relationships between metabolic status and oxidative stress in periparturient dairy cows. *J Dairy Sci*. 2005; 88: 2017–2026. [https://doi.org/10.3168/jds.S0022-0302\(05\)72878-2](https://doi.org/10.3168/jds.S0022-0302(05)72878-2) PMID: 15905432
  42. Weiss WP, Hogan JS, Smith KL. Changes in vitamin C concentrations in plasma and milk from dairy cows after an intramammary infusion of *Escherichia coli*. *J Dairy Sci*. 2004; 87: 32–37. [https://doi.org/10.3168/jds.S0022-0302\(04\)73138-0](https://doi.org/10.3168/jds.S0022-0302(04)73138-0) PMID: 14765807
  43. Agarwal A, Gupta S, Sharma RK. Role of oxidative stress in female reproduction. *Reprod Biol Endocrinol*. 2005; 3: 28. <https://doi.org/10.1186/1477-7827-3-28> PMID: 16018814
  44. Guerin P, El Mouatassim S, Menezo Y. Oxidative stress and protection against reactive oxygen species in the pre-implantation embryo and its surroundings. *Hum Reprod Update*. 2001; 7: 175–189. PMID: 11284661
  45. Brannstrom M, Norman RJ. Involvement of leukocytes and cytokines in the ovulatory process and corpus luteum function. *Hum Reprod*. 1993; 8: 1762–1775. PMID: 8300842
  46. Yang H, Xie Y, Yang D, Ren D. Oxidative stress-induced apoptosis in granulosa cells involves JNK, p53 and Puma. *Oncotarget*. 2017; 8: 25310–25322. <https://doi.org/10.18632/oncotarget.15813> PMID: 28445976
  47. Assou S, Haouzi D, Vos J de, Hamamah S. Human cumulus cells as biomarkers for embryo and pregnancy outcomes. *Mol Hum Reprod*. 2010; 16: 531–538. <https://doi.org/10.1093/molehr/gaq032> PMID: 20435608
  48. Shiota M, Sugai N, Tamura M, Yamaguchi R, Fukushima N, Miyano T, et al. Correlation of mitogen-activated protein kinase activities with cell survival and apoptosis in porcine granulosa cells. *Zoolog Sci*. 2003; 20: 193–201. <https://doi.org/10.2108/zsj.20.193> PMID: 12655182
  49. Adeldust H, Zeinoaldini S, Kohram H, Amiri Roudbar M, Daliri Joupari M. In vitro maturation of ovine oocyte in a modified granulosa cells co-culture system and alpha-tocopherol supplementation: effects on nuclear maturation and cleavage. *J Anim Sci Technol*. 2015; 57: 27. <https://doi.org/10.1186/s40781-015-0061-5> PMID: 26290747
  50. Tripathi A, Shrivastav TG, Chaube SK. An increase of granulosa cell apoptosis mediates aqueous neem (*Azadirachta indica*) leaf extract-induced oocyte apoptosis in rat. *Int J Appl Basic Med Res*. 2013; 3: 27–36. <https://doi.org/10.4103/2229-516X.112238> PMID: 23776837
  51. Tamura H, Takasaki A, Miwa I, Taniguchi K, Maekawa R, Asada H, et al. Oxidative stress impairs oocyte quality and melatonin protects oocytes from free radical damage and improves fertilization rate. *J Pineal Res*. 2008; 44: 280–287. <https://doi.org/10.1111/j.1600-079X.2007.00524.x> PMID: 18339123
  52. Tanabe M, Tamura H, Taketani T, Okada M, Lee L, Tamura I, et al. Melatonin protects the integrity of granulosa cells by reducing oxidative stress in nuclei, mitochondria, and plasma membranes in mice. *J Reprod Dev*. 2015; 61: 35–41. <https://doi.org/10.1262/jrd.2014-105> PMID: 25366368
  53. Devine PJ, Perreault SD, Luderer U. Roles of reactive oxygen species and antioxidants in ovarian toxicity. *Biol Reprod*. 2012; 86: 27. <https://doi.org/10.1095/biolreprod.111.095224> PMID: 22034525
  54. Qu F, Wang F-F, Yin R, Ding G-L, El-Prince M, Gao Q, et al. A molecular mechanism underlying ovarian dysfunction of polycystic ovary syndrome: hyperandrogenism induces epigenetic alterations in the granulosa cells. *J Mol Med (Berl)*. 2012; 90: 911–923. <https://doi.org/10.1007/s00109-012-0881-4> PMID: 22349439
  55. Chernyak BV, Izyumov DS, Lyamzaev KG, Pashkovskaya AA, Pletjushkina OY, Antonenko YN, et al. Production of reactive oxygen species in mitochondria of HeLa cells under oxidative stress. *Biochim Biophys Acta*. 2006; 1757: 525–534. <https://doi.org/10.1016/j.bbabi.2006.02.019> PMID: 16678116
  56. Andreyev AY, Kushnareva YE, Starkov AA. Mitochondrial metabolism of reactive oxygen species. *Biochemistry (Mosc)*. 2005; 70: 200–214.
  57. Turrens JF. Mitochondrial formation of reactive oxygen species. *J Physiol*. 2003; 552: 335–344. <https://doi.org/10.1113/jphysiol.2003.049478> PMID: 14561818
  58. Rasbach KA, Schnellmann RG. Signaling of mitochondrial biogenesis following oxidant injury. *J Biol Chem*. 2007; 282: 2355–2362. <https://doi.org/10.1074/jbc.M608009200> PMID: 17116659
  59. Michael J. Berridge. Cell cycle and proliferation. *Cell signaling biology*. 2012; 16: 1150–1180. <https://doi.org/10.1042/csb000100>



60. Li M, Zhao L, Liu J, Liu A-L, Zeng W-S, Luo S-Q, et al. Hydrogen peroxide induces G2 cell cycle arrest and inhibits cell proliferation in osteoblasts. *Anat Rec (Hoboken)*. 2009; 292: 1107–1113. <https://doi.org/10.1002/ar.20925> PMID: 19645015
61. Bryan HK, Olayanju A, Goldring CE, Park BK. The Nrf2 cell defence pathway: Keap1-dependent and -independent mechanisms of regulation. *Biochem Pharmacol*. 2013; 85: 705–717. <https://doi.org/10.1016/j.bcp.2012.11.016> PMID: 23219527
62. Singh S, Vrishni S, Singh BK, Rahman I, Kakkar P. Nrf2-ARE stress response mechanism: a control point in oxidative stress-mediated dysfunctions and chronic inflammatory diseases. *Free Radic Res*. 2010; 44: 1267–1288. <https://doi.org/10.3109/10715762.2010.507670> PMID: 20815789
63. Amin A, Gad A, Salilew-Wondim D, Prastowo S, Held E, Hoelker M, et al. Bovine embryo survival under oxidative-stress conditions is associated with activity of the NRF2-mediated oxidative-stress-response pathway. *Mol Reprod Dev*. 2014; 81: 497–513. PMID: 25057524
64. Jin X, Wang K, Liu H, Hu F, Zhao F, Liu J. Protection of Bovine Mammary Epithelial Cells from Hydrogen Peroxide-Induced Oxidative Cell Damage by Resveratrol. *Oxid Med Cell Longev*. 2016; 2016: 2572175. <https://doi.org/10.1155/2016/2572175> PMID: 26962394
65. Bienert GP, Schjoerring JK, Jahn TP. Membrane transport of hydrogen peroxide. *Biochim Biophys Acta*. 2006; 1758: 994–1003. <https://doi.org/10.1016/j.bbamem.2006.02.015> PMID: 16566894
66. Wang Y, Wang W, Qiu E. Protection of oxidative stress induced apoptosis in osteosarcoma cells by dihydromyricetin through down-regulation of caspase activation and up-regulation of Bcl-2. *Saudi J Biol Sci*. 2017; 24: 837–842. <https://doi.org/10.1016/j.sjbs.2016.12.004> PMID: 28490955
67. Song H, Cha M-J, Song B-W, Kim I-K, Chang W, Lim S, et al. Reactive oxygen species inhibit adhesion of mesenchymal stem cells implanted into ischemic myocardium via interference of focal adhesion complex. *Stem Cells*. 2010; 28: 555–563. <https://doi.org/10.1002/stem.302> PMID: 20073042
68. Santonocito M, Vento M, Guglielmino MR, Battaglia R, Wahlgren J, Ragusa M, et al. Molecular characterization of exosomes and their microRNA cargo in human follicular fluid: bioinformatic analysis reveals that exosomal microRNAs control pathways involved in follicular maturation. *Fertil Steril*. 2014; 102: 1751–61.e1. <https://doi.org/10.1016/j.fertnstert.2014.08.005> PMID: 25241362
69. Navakanitworakul R, Hung W-T, Gunewardena S, Davis JS, Chotigeat W, Christenson LK. Characterization and Small RNA Content of Extracellular Vesicles in Follicular Fluid of Developing Bovine Antral Follicles. *Sci Rep*. 2016; 6: 25486. <https://doi.org/10.1038/srep25486> PMID: 27158133
70. Hung W-T, Hong X, Christenson LK, McGinnis LK. Extracellular Vesicles from Bovine Follicular Fluid Support Cumulus Expansion. *Biol Reprod*. 2015; 93: 117. <https://doi.org/10.1095/biolreprod.115.132977> PMID: 26423123
71. Ailawadi S, Wang X, Gu H, Fan G-C. Pathologic function and therapeutic potential of exosomes in cardiovascular disease. *Biochim Biophys Acta*. 2015; 1852: 1–11. <https://doi.org/10.1016/j.bbadis.2014.10.008> PMID: 25463630
72. Harmati M, Tarnai Z, Decsi G, Korondi S, Szegletes Z, Janovak L, et al. Stressors alter intercellular communication and exosome profile of nasopharyngeal carcinoma cells. *J Oral Pathol Med*. 2017; 46: 259–266. <https://doi.org/10.1111/jop.12486> PMID: 27598726
73. Jong OG de, Verhaar MC, Chen Y, Vader P, Gremmels H, Posthuma G, et al. Cellular stress conditions are reflected in the protein and RNA content of endothelial cell-derived exosomes. *J Extracell Vesicles*. 2012; 1. <https://doi.org/10.3402/jev.v1i0.18396> PMID: 24009886
74. Feng Du, Zhao W-L, Ye Y-Y, Bai X-C, Liu R-Q, Chang L-F, et al. Cellular internalization of exosomes occurs through phagocytosis. *Traffic*. 2010; 11: 675–687. <https://doi.org/10.1111/j.1600-0854.2010.01041.x> PMID: 20136776
75. Hannafon BN, Ding W-Q. Intercellular communication by exosome-derived microRNAs in cancer. *Int J Mol Sci*. 2013; 14: 14240–14269. <https://doi.org/10.3390/ijms140714240> PMID: 23839094
76. Clayton A, Turkes A, Dewitt S, Steadman R, Mason MD, Hallett MB. Adhesion and signaling by B cell-derived exosomes: the role of integrins. *FASEB J*. 2004; 18: 977–979. <https://doi.org/10.1096/fj.03-1094fje> PMID: 15059973
77. Montecalvo A, Larregina AT, Shufesky WJ, Stolz DB, Sullivan MLG, Karlsson JM, et al. Mechanism of transfer of functional microRNAs between mouse dendritic cells via exosomes. *Blood*. 2012; 119: 756–766. <https://doi.org/10.1182/blood-2011-02-338004> PMID: 22031862
78. Kahlert C, Kalluri R. Exosomes in tumor microenvironment influence cancer progression and metastasis. *J Mol Med (Berl)*. 2013; 91: 431–437. <https://doi.org/10.1007/s00109-013-1020-6> PMID: 23519402
79. Yousefpour P, Chilkoti A. Co-opting biology to deliver drugs. *Biotechnol Bioeng*. 2014; 111: 1699–1716. <https://doi.org/10.1002/bit.25307> PMID: 24916780
80. Braccioli L, van Velthoven C, Heijnen CJ. Exosomes: a new weapon to treat the central nervous system. *Mol Neurobiol*. 2014; 49: 113–119. <https://doi.org/10.1007/s12035-013-8504-9> PMID: 23857502

81. Haney MJ, Klyachko NL, Zhao Y, Gupta R, Plotnikova EG, He Z, et al. Exosomes as drug delivery vehicles for Parkinson's disease therapy. *J Control Release*. 2015; 207: 18–30. <https://doi.org/10.1016/j.jconrel.2015.03.033> PMID: 25836593
